# Supplementary material
Source: publisher figshare collection journal article supplement (https://sage.figshare.com/ndownloader/files/21875307)
Supplement: Supplementary file 1 [file 21875307]

## Sheet: Assumptions and results
												Cluster		Business Case Horizon
								WACC	integrated	0.05				8	9	10	11	12	13	14	15	16	17	18	19	20	21	22	23	24
		Years to break even		Profitability gap after 15 years (in million)					wholesale-only	0.05		Urban	1	0	0	0	0.5	1	1	1	1	1	1	1	1	1	1	1	1	1
	Cluster	Integrated	Wholesale-only	Integrated	Wholesale-only			ARPL/ARPU	integrated	45			2	0	0	0	0	0.5	1	1	1	1	1	1	1	1	1	1	1	1
	1	9	10	959.472	727.001				wholesale-only	35			3	0	0	0	0	0.5	0.5	1	1	1	1	1	1	1	1	1	1	1
	2	10	11	825.281	587.068			years to final takeup	integrated	8			4	0	0	0	0	0	0.5	1	1	1	1	1	1	1	1	1	1	1
	3	10	12	777.867	533.91				wholesale-only	8			5	0	0	0	0	0	0.5	1	1	1	1	1	1	1	1	1	1	1
	4	11	12	766.625	516.921			EBITDA margin	integrated	0.45		Suburban	6	0	0	0	0	0	0.5	1	1	1	1	1	1	1	1	1	1	1
	5	11	12	740.951	485.497				wholesale-only	0.53			7	0	0	0	0	0	0.5	0.5	1	1	1	1	1	1	1	1	1	1
	6	11	12	686.385	425.179			OPEX reduction (vert. Eff)	integrated	2			8	0	0	0	0	0	0	0.5	0.5	1	1	1	1	1	1	1	1	1
	7	11	13	653.53	386.571				wholesale-only	0			9	0	0	0	0	0	0	0	0.5	1	1	1	1	1	1	1	1	1
	8	12	14	525.816	253.101			final take up Cluster 1	integrated	0.55			10	0	0	0	0	0	0	0	0.5	0.5	1	1	1	1	1	1	1	1
	9	13	14	484.875	206.402				wholesale-only	0.55			11	0	0	0	0	0	0	0	0	0.5	1	1	1	1	1	1	1	1
	10	13	15	349.977	65.7447			final take up Cluster 20	integrated	0.8			12	0	0	0	0	0	0	0	0	0.5	0.5	1	1	1	1	1	1	1
	11	14	15	323.538	33.5438				wholesale-only	0.8			13	0	0	0	0	0	0	0	0	0	0.5	1	1	1	1	1	1	1
	12	14	16	267.301	-28.4579								14	0	0	0	0	0	0	0	0	0	0.5	0.5	1	1	1	1	1	1
	13	15	16	159.576	-141.948								15	0	0	0	0	0	0	0	0	0	0.5	0.5	1	1	1	1	1	1
	14	15	17	74.4623	-232.83							Rural	16	0	0	0	0	0	0	0	0	0	0	0.5	0.5	1	1	1	1	1
	15	15	17	62.5635	-250.498								17	0	0	0	0	0	0	0	0	0	0	0	0.5	0.5	1	1	1	1
	16	16	18	-53.2348	-372.067								18	0	0	0	0	0	0	0	0	0	0	0	0	0	0	0	0	0.5
	17	17	19	-187.087	-511.693								19	0	0	0	0	0	0	0	0	0	0	0	0	0	0	0	0	0
	18	22	26	-1061.91	-1392.29								20	0	0	0	0	0	0	0	0	0	0	0	0	0	0	0	0	0
	19	33	42	-2177.08	-2513.23
	20	>50	>50	-3894.05	-4235.99

## Sheet: Cost inputs
			Cluster	CAPEX per household	# of households	final takeup int	final takeup wo		WIK original	factor	base Feijoo urban
			1	876	2038700	0.55	0.55		876		656
			2	985	2038700	0.563158	0.563158		985	1.12443	737.626
			3	1046	2038700	0.576316	0.576316		1046	1.06193	783.306
			4	1087	2038700	0.589474	0.589474		1087	1.0392	814.009
			5	1136	2038700	0.602632	0.602632		1136	1.04508	850.703
			6	1201	2038700	0.615789	0.615789		1201	1.05722	899.379
			7	1254	2038700	0.628947	0.628947		1254	1.04413	939.068
			8	1359.5	2038700	0.642105	0.642105		1359.5	1.08413	1018.07
			9	1417	2038700	0.655263	0.655263		1417	1.04229	1061.13
			10	1526.5	2038700	0.668421	0.668421		1526.5	1.07728	1143.13
			11	1576	2038700	0.681579	0.681579		1576	1.03243	1180.2
			12	1642	2038700	0.694737	0.694737		1642	1.04188	1229.63
			13	1736.5	2038700	0.707895	0.707895		1736.5	1.05755	1300.39
			14	1818.5	2038700	0.721053	0.721053		1818.5	1.04722	1361.8
			15	1860	2038700	0.734211	0.734211		1860	1.02282	1392.88
			16	1959	2038700	0.747368	0.747368		1959	1.05323	1467.01
			17	2068	2038700	0.760526	0.760526		2068	1.05564	1548.64
			18	2587	2038700	0.773684	0.773684		2587	1.25097	1937.3
			19	3239	2038700	0.786842	0.786842		3239	1.25203	2425.55
			20	4224	2038700	0.8	0.8		4224	1.30411	3163.18
					urban	656	480	1.36667
					suburban	1388	480	2.89167
					semi-rural	2054	480	4.27917
					rural	2609	480	5.43542
					extremely rural	6711	480	13.9812

## Sheet: upfront investment module
		Cluster	Capex total	Capex year 1	Capex year 2	Capex year 3	Capex year 4	NPV Capex int	NPV Capex wo
		1	1785901200	446475300	446475300	446475300	446475300	1.58318e+09	1.58318e+09
		2	2008119500	502029875	502029875	502029875	502029875	1.78017e+09	1.78017e+09
		3	2132480200	533120050	533120050	533120050	533120050	1.89042e+09	1.89042e+09
		4	2216066900	554016725	554016725	554016725	554016725	1.96452e+09	1.96452e+09
		5	2315963200	578990800	578990800	578990800	578990800	2.05307e+09	2.05307e+09
		6	2448478700	612119675	612119675	612119675	612119675	2.17055e+09	2.17055e+09
		7	2556529800	639132450	639132450	639132450	639132450	2.26633e+09	2.26633e+09
		8	2771612650	6.92903e+08	6.92903e+08	6.92903e+08	6.92903e+08	2.457e+09	2.457e+09
		9	2888837900	722209475	722209475	722209475	722209475	2.56092e+09	2.56092e+09
		10	3112075550	7.78019e+08	7.78019e+08	7.78019e+08	7.78019e+08	2.75882e+09	2.75882e+09
		11	3212991200	803247800	803247800	803247800	803247800	2.84828e+09	2.84828e+09
		12	3347545400	836886350	836886350	836886350	836886350	2.96756e+09	2.96756e+09
		13	3540202550	8.85051e+08	8.85051e+08	8.85051e+08	8.85051e+08	3.13835e+09	3.13835e+09
		14	3707375950	9.26844e+08	9.26844e+08	9.26844e+08	9.26844e+08	3.28654e+09	3.28654e+09
		15	3791982000	947995500	947995500	947995500	947995500	3.36155e+09	3.36155e+09
		16	3993813300	998453325	998453325	998453325	998453325	3.54047e+09	3.54047e+09
		17	4216031600	1054007900	1054007900	1054007900	1054007900	3.73746e+09	3.73746e+09
		18	5274116900	1318529225	1318529225	1318529225	1318529225	4.67544e+09	4.67544e+09
		19	6603349300	1650837325	1650837325	1650837325	1650837325	5.85379e+09	5.85379e+09
		20	8611468800	2152867200	2152867200	2152867200	2152867200	7.63396e+09	7.63396e+09

## Sheet: Demand model
	integrated
		Cluster	final takeup	growth rate		1	2	3	4	5	6	7	8	9	10	11	12	13	14	15	16	17	18	19	20	21	22	23	24	25	26	27	28	29	30	31	32	33	34	35	36	37	38	39	40	41	42	43	44
		1	0.55	0.58756		0.244375	0.38017	0.455629	0.49756	0.52086	0.533807	0.541002	0.545	0.547222	0.548456	0.549142	0.549523	0.549735	0.549853	0.549918	0.549955	0.549975	0.549986	0.549992	0.549996	0.549998	0.549999	0.549999	0.55	0.55	0.55	0.55	0.55	0.55	0.55	0.55	0.55	0.55	0.55	0.55	0.55	0.55	0.55	0.55	0.55	0.55	0.55	0.55	0.55
		2	0.563158	0.590515		0.251145	0.39029	0.467382	0.510094	0.533758	0.546869	0.554133	0.558158	0.560388	0.561623	0.562308	0.562687	0.562897	0.563013	0.563078	0.563114	0.563133	0.563144	0.56315	0.563154	0.563156	0.563157	0.563157	0.563158	0.563158	0.563158	0.563158	0.563158	0.563158	0.563158	0.563158	0.563158	0.563158	0.563158	0.563158	0.563158	0.563158	0.563158	0.563158	0.563158	0.563158	0.563158	0.563158	0.563158
		3	0.576316	0.593402		0.257933	0.400427	0.479147	0.522635	0.54666	0.559933	0.567265	0.571316	0.573554	0.57479	0.575473	0.57585	0.576059	0.576174	0.576237	0.576272	0.576292	0.576303	0.576308	0.576312	0.576314	0.576315	0.576315	0.576315	0.576316	0.576316	0.576316	0.576316	0.576316	0.576316	0.576316	0.576316	0.576316	0.576316	0.576316	0.576316	0.576316	0.576316	0.576316	0.576316	0.576316	0.576316	0.576316	0.576316
		4	0.589474	0.596224		0.26474	0.410582	0.490924	0.535184	0.559566	0.572998	0.580397	0.584474	0.586719	0.587956	0.588638	0.589013	0.58922	0.589334	0.589397	0.589431	0.58945	0.589461	0.589467	0.58947	0.589472	0.589472	0.589473	0.589473	0.589473	0.589474	0.589474	0.589474	0.589474	0.589474	0.589474	0.589474	0.589474	0.589474	0.589474	0.589474	0.589474	0.589474	0.589474	0.589474	0.589474	0.589474	0.589474	0.589474
		5	0.602632	0.598984		0.271564	0.420753	0.502713	0.547739	0.572475	0.586065	0.59353	0.597632	0.599885	0.601123	0.601803	0.602176	0.602381	0.602494	0.602556	0.60259	0.602609	0.602619	0.602625	0.602628	0.60263	0.60263	0.602631	0.602631	0.602631	0.602631	0.602632	0.602632	0.602632	0.602632	0.602632	0.602632	0.602632	0.602632	0.602632	0.602632	0.602632	0.602632	0.602632	0.602632	0.602632	0.602632	0.602632	0.602632
		6	0.615789	0.601683		0.278405	0.430941	0.514513	0.560301	0.585388	0.599133	0.606664	0.610789	0.61305	0.614289	0.614967	0.615339	0.615543	0.615654	0.615715	0.615749	0.615767	0.615777	0.615783	0.615786	0.615787	0.615788	0.615789	0.615789	0.615789	0.615789	0.615789	0.615789	0.615789	0.615789	0.615789	0.615789	0.615789	0.615789	0.615789	0.615789	0.615789	0.615789	0.615789	0.615789	0.615789	0.615789	0.615789	0.615789
		7	0.628947	0.604326		0.285264	0.441144	0.526324	0.572869	0.598304	0.612203	0.619797	0.623947	0.626215	0.627454	0.628132	0.628502	0.628704	0.628814	0.628875	0.628908	0.628926	0.628935	0.628941	0.628944	0.628945	0.628946	0.628947	0.628947	0.628947	0.628947	0.628947	0.628947	0.628947	0.628947	0.628947	0.628947	0.628947	0.628947	0.628947	0.628947	0.628947	0.628947	0.628947	0.628947	0.628947	0.628947	0.628947	0.628947
		8	0.642105	0.606914		0.292139	0.451363	0.538145	0.585444	0.611223	0.625274	0.632931	0.637105	0.63938	0.64062	0.641296	0.641664	0.641865	0.641974	0.642034	0.642066	0.642084	0.642094	0.642099	0.642102	0.642103	0.642104	0.642105	0.642105	0.642105	0.642105	0.642105	0.642105	0.642105	0.642105	0.642105	0.642105	0.642105	0.642105	0.642105	0.642105	0.642105	0.642105	0.642105	0.642105	0.642105	0.642105	0.642105	0.642105
		9	0.655263	0.60945		0.299029	0.461597	0.549976	0.598024	0.624145	0.638346	0.646066	0.650263	0.652545	0.653785	0.65446	0.654826	0.655026	0.655134	0.655193	0.655225	0.655242	0.655252	0.655257	0.65526	0.655261	0.655262	0.655263	0.655263	0.655263	0.655263	0.655263	0.655263	0.655263	0.655263	0.655263	0.655263	0.655263	0.655263	0.655263	0.655263	0.655263	0.655263	0.655263	0.655263	0.655263	0.655263	0.655263	0.655263
		10	0.668421	0.611935		0.305936	0.471845	0.561818	0.61061	0.63707	0.651419	0.659201	0.663421	0.66571	0.666951	0.667624	0.667989	0.668187	0.668294	0.668352	0.668384	0.668401	0.66841	0.668415	0.668418	0.668419	0.66842	0.668421	0.668421	0.668421	0.668421	0.668421	0.668421	0.668421	0.668421	0.668421	0.668421	0.668421	0.668421	0.668421	0.668421	0.668421	0.668421	0.668421	0.668421	0.668421	0.668421	0.668421	0.668421
		11	0.681579	0.614372		0.312858	0.482108	0.573669	0.623202	0.649998	0.664494	0.672336	0.676579	0.678874	0.680116	0.680787	0.681151	0.681347	0.681454	0.681511	0.681542	0.681559	0.681568	0.681573	0.681576	0.681577	0.681578	0.681578	0.681579	0.681579	0.681579	0.681579	0.681579	0.681579	0.681579	0.681579	0.681579	0.681579	0.681579	0.681579	0.681579	0.681579	0.681579	0.681579	0.681579	0.681579	0.681579	0.681579	0.681579
		12	0.694737	0.616762		0.319795	0.492385	0.58553	0.635799	0.662929	0.67757	0.685472	0.689737	0.692038	0.693281	0.693951	0.694313	0.694508	0.694613	0.69467	0.694701	0.694717	0.694726	0.694731	0.694734	0.694735	0.694736	0.694736	0.694737	0.694737	0.694737	0.694737	0.694737	0.694737	0.694737	0.694737	0.694737	0.694737	0.694737	0.694737	0.694737	0.694737	0.694737	0.694737	0.694737	0.694737	0.694737	0.694737	0.694737
		13	0.707895	0.619107		0.326747	0.502675	0.597399	0.648401	0.675862	0.690647	0.698608	0.702895	0.705203	0.706445	0.707114	0.707475	0.707668	0.707773	0.707829	0.707859	0.707876	0.707884	0.707889	0.707892	0.707893	0.707894	0.707894	0.707894	0.707895	0.707895	0.707895	0.707895	0.707895	0.707895	0.707895	0.707895	0.707895	0.707895	0.707895	0.707895	0.707895	0.707895	0.707895	0.707895	0.707895	0.707895	0.707895	0.707895
		14	0.721053	0.621409		0.333713	0.512979	0.609278	0.661009	0.688798	0.703726	0.711745	0.716053	0.718367	0.71961	0.720278	0.720636	0.720829	0.720932	0.720988	0.721018	0.721034	0.721043	0.721047	0.72105	0.721051	0.721052	0.721052	0.721052	0.721053	0.721053	0.721053	0.721053	0.721053	0.721053	0.721053	0.721053	0.721053	0.721053	0.721053	0.721053	0.721053	0.721053	0.721053	0.721053	0.721053	0.721053	0.721053	0.721053
		15	0.734211	0.62367		0.340693	0.523295	0.621165	0.673621	0.701736	0.716805	0.724882	0.729211	0.731531	0.732774	0.733441	0.733798	0.733989	0.734092	0.734147	0.734176	0.734192	0.734201	0.734205	0.734208	0.734209	0.73421	0.73421	0.73421	0.73421	0.73421	0.73421	0.734211	0.734211	0.734211	0.734211	0.734211	0.734211	0.734211	0.734211	0.734211	0.734211	0.734211	0.734211	0.734211	0.734211	0.734211	0.734211	0.734211
		16	0.747368	0.62589		0.347687	0.533625	0.633061	0.686239	0.714677	0.729886	0.738019	0.742368	0.744694	0.745938	0.746604	0.746959	0.74715	0.747251	0.747306	0.747335	0.747351	0.747359	0.747363	0.747366	0.747367	0.747368	0.747368	0.747368	0.747368	0.747368	0.747368	0.747368	0.747368	0.747368	0.747368	0.747368	0.747368	0.747368	0.747368	0.747368	0.747368	0.747368	0.747368	0.747368	0.747368	0.747368	0.747368	0.747368
		17	0.760526	0.628072		0.354694	0.543966	0.644966	0.698861	0.72762	0.742967	0.751156	0.755526	0.757858	0.759103	0.759767	0.760121	0.76031	0.760411	0.760465	0.760493	0.760509	0.760517	0.760521	0.760524	0.760525	0.760526	0.760526	0.760526	0.760526	0.760526	0.760526	0.760526	0.760526	0.760526	0.760526	0.760526	0.760526	0.760526	0.760526	0.760526	0.760526	0.760526	0.760526	0.760526	0.760526	0.760526	0.760526	0.760526
		18	0.773684	0.630216		0.361715	0.55432	0.656878	0.711488	0.740566	0.756049	0.764294	0.768684	0.771022	0.772267	0.772929	0.773282	0.77347	0.77357	0.773624	0.773652	0.773667	0.773675	0.773679	0.773682	0.773683	0.773683	0.773684	0.773684	0.773684	0.773684	0.773684	0.773684	0.773684	0.773684	0.773684	0.773684	0.773684	0.773684	0.773684	0.773684	0.773684	0.773684	0.773684	0.773684	0.773684	0.773684	0.773684	0.773684
		19	0.786842	0.632324		0.368749	0.564686	0.668798	0.724119	0.753514	0.769133	0.777432	0.781842	0.784185	0.78543	0.786092	0.786444	0.78663	0.78673	0.786782	0.78681	0.786825	0.786833	0.786837	0.78684	0.786841	0.786841	0.786842	0.786842	0.786842	0.786842	0.786842	0.786842	0.786842	0.786842	0.786842	0.786842	0.786842	0.786842	0.786842	0.786842	0.786842	0.786842	0.786842	0.786842	0.786842	0.786842	0.786842	0.786842
		20	0.8	0.634397		0.375796	0.575063	0.680726	0.736754	0.766464	0.782217	0.790571	0.795	0.797349	0.798594	0.799255	0.799605	0.79979	0.799889	0.799941	0.799969	0.799983	0.799991	0.799995	0.799998	0.799999	0.799999	0.8	0.8	0.8	0.8	0.8	0.8	0.8	0.8	0.8	0.8	0.8	0.8	0.8	0.8	0.8	0.8	0.8	0.8	0.8	0.8	0.8	0.8
	wholesale only
		Cluster	final takeup	growth rate	0	1	2	3	4	5	6	7	8	9	10	11	12	13	14	15	16	17	18	19	20	21	22	23	24	25	26	27	28	29	30	31	32	33	34	35	36	37	38	39	40	41	42	43	44
		1	0.55	0.58756	0	0.244375	0.38017	0.455629	0.49756	0.52086	0.533807	0.541002	0.545	0.547222	0.548456	0.549142	0.549523	0.549735	0.549853	0.549918	0.549955	0.549975	0.549986	0.549992	0.549996	0.549998	0.549999	0.549999	0.55	0.55	0.55	0.55	0.55	0.55	0.55	0.55	0.55	0.55	0.55	0.55	0.55	0.55	0.55	0.55	0.55	0.55	0.55	0.55	0.55
		2	0.563158	0.590515	0	0.251145	0.39029	0.467382	0.510094	0.533758	0.546869	0.554133	0.558158	0.560388	0.561623	0.562308	0.562687	0.562897	0.563013	0.563078	0.563114	0.563133	0.563144	0.56315	0.563154	0.563156	0.563157	0.563157	0.563158	0.563158	0.563158	0.563158	0.563158	0.563158	0.563158	0.563158	0.563158	0.563158	0.563158	0.563158	0.563158	0.563158	0.563158	0.563158	0.563158	0.563158	0.563158	0.563158	0.563158
		3	0.576316	0.593402	0	0.257933	0.400427	0.479147	0.522635	0.54666	0.559933	0.567265	0.571316	0.573554	0.57479	0.575473	0.57585	0.576059	0.576174	0.576237	0.576272	0.576292	0.576303	0.576308	0.576312	0.576314	0.576315	0.576315	0.576315	0.576316	0.576316	0.576316	0.576316	0.576316	0.576316	0.576316	0.576316	0.576316	0.576316	0.576316	0.576316	0.576316	0.576316	0.576316	0.576316	0.576316	0.576316	0.576316	0.576316
		4	0.589474	0.596224	0	0.26474	0.410582	0.490924	0.535184	0.559566	0.572998	0.580397	0.584474	0.586719	0.587956	0.588638	0.589013	0.58922	0.589334	0.589397	0.589431	0.58945	0.589461	0.589467	0.58947	0.589472	0.589472	0.589473	0.589473	0.589473	0.589474	0.589474	0.589474	0.589474	0.589474	0.589474	0.589474	0.589474	0.589474	0.589474	0.589474	0.589474	0.589474	0.589474	0.589474	0.589474	0.589474	0.589474	0.589474
		5	0.602632	0.598984	0	0.271564	0.420753	0.502713	0.547739	0.572475	0.586065	0.59353	0.597632	0.599885	0.601123	0.601803	0.602176	0.602381	0.602494	0.602556	0.60259	0.602609	0.602619	0.602625	0.602628	0.60263	0.60263	0.602631	0.602631	0.602631	0.602631	0.602632	0.602632	0.602632	0.602632	0.602632	0.602632	0.602632	0.602632	0.602632	0.602632	0.602632	0.602632	0.602632	0.602632	0.602632	0.602632	0.602632	0.602632
		6	0.615789	0.601683	0	0.278405	0.430941	0.514513	0.560301	0.585388	0.599133	0.606664	0.610789	0.61305	0.614289	0.614967	0.615339	0.615543	0.615654	0.615715	0.615749	0.615767	0.615777	0.615783	0.615786	0.615787	0.615788	0.615789	0.615789	0.615789	0.615789	0.615789	0.615789	0.615789	0.615789	0.615789	0.615789	0.615789	0.615789	0.615789	0.615789	0.615789	0.615789	0.615789	0.615789	0.615789	0.615789	0.615789	0.615789
		7	0.628947	0.604326	0	0.285264	0.441144	0.526324	0.572869	0.598304	0.612203	0.619797	0.623947	0.626215	0.627454	0.628132	0.628502	0.628704	0.628814	0.628875	0.628908	0.628926	0.628935	0.628941	0.628944	0.628945	0.628946	0.628947	0.628947	0.628947	0.628947	0.628947	0.628947	0.628947	0.628947	0.628947	0.628947	0.628947	0.628947	0.628947	0.628947	0.628947	0.628947	0.628947	0.628947	0.628947	0.628947	0.628947	0.628947
		8	0.642105	0.606914	0	0.292139	0.451363	0.538145	0.585444	0.611223	0.625274	0.632931	0.637105	0.63938	0.64062	0.641296	0.641664	0.641865	0.641974	0.642034	0.642066	0.642084	0.642094	0.642099	0.642102	0.642103	0.642104	0.642105	0.642105	0.642105	0.642105	0.642105	0.642105	0.642105	0.642105	0.642105	0.642105	0.642105	0.642105	0.642105	0.642105	0.642105	0.642105	0.642105	0.642105	0.642105	0.642105	0.642105	0.642105
		9	0.655263	0.60945	0	0.299029	0.461597	0.549976	0.598024	0.624145	0.638346	0.646066	0.650263	0.652545	0.653785	0.65446	0.654826	0.655026	0.655134	0.655193	0.655225	0.655242	0.655252	0.655257	0.65526	0.655261	0.655262	0.655263	0.655263	0.655263	0.655263	0.655263	0.655263	0.655263	0.655263	0.655263	0.655263	0.655263	0.655263	0.655263	0.655263	0.655263	0.655263	0.655263	0.655263	0.655263	0.655263	0.655263	0.655263
		10	0.668421	0.611935	0	0.305936	0.471845	0.561818	0.61061	0.63707	0.651419	0.659201	0.663421	0.66571	0.666951	0.667624	0.667989	0.668187	0.668294	0.668352	0.668384	0.668401	0.66841	0.668415	0.668418	0.668419	0.66842	0.668421	0.668421	0.668421	0.668421	0.668421	0.668421	0.668421	0.668421	0.668421	0.668421	0.668421	0.668421	0.668421	0.668421	0.668421	0.668421	0.668421	0.668421	0.668421	0.668421	0.668421	0.668421
		11	0.681579	0.614372	0	0.312858	0.482108	0.573669	0.623202	0.649998	0.664494	0.672336	0.676579	0.678874	0.680116	0.680787	0.681151	0.681347	0.681454	0.681511	0.681542	0.681559	0.681568	0.681573	0.681576	0.681577	0.681578	0.681578	0.681579	0.681579	0.681579	0.681579	0.681579	0.681579	0.681579	0.681579	0.681579	0.681579	0.681579	0.681579	0.681579	0.681579	0.681579	0.681579	0.681579	0.681579	0.681579	0.681579	0.681579
		12	0.694737	0.616762	0	0.319795	0.492385	0.58553	0.635799	0.662929	0.67757	0.685472	0.689737	0.692038	0.693281	0.693951	0.694313	0.694508	0.694613	0.69467	0.694701	0.694717	0.694726	0.694731	0.694734	0.694735	0.694736	0.694736	0.694737	0.694737	0.694737	0.694737	0.694737	0.694737	0.694737	0.694737	0.694737	0.694737	0.694737	0.694737	0.694737	0.694737	0.694737	0.694737	0.694737	0.694737	0.694737	0.694737	0.694737
		13	0.707895	0.619107	0	0.326747	0.502675	0.597399	0.648401	0.675862	0.690647	0.698608	0.702895	0.705203	0.706445	0.707114	0.707475	0.707668	0.707773	0.707829	0.707859	0.707876	0.707884	0.707889	0.707892	0.707893	0.707894	0.707894	0.707894	0.707895	0.707895	0.707895	0.707895	0.707895	0.707895	0.707895	0.707895	0.707895	0.707895	0.707895	0.707895	0.707895	0.707895	0.707895	0.707895	0.707895	0.707895	0.707895	0.707895
		14	0.721053	0.621409	0	0.333713	0.512979	0.609278	0.661009	0.688798	0.703726	0.711745	0.716053	0.718367	0.71961	0.720278	0.720636	0.720829	0.720932	0.720988	0.721018	0.721034	0.721043	0.721047	0.72105	0.721051	0.721052	0.721052	0.721052	0.721053	0.721053	0.721053	0.721053	0.721053	0.721053	0.721053	0.721053	0.721053	0.721053	0.721053	0.721053	0.721053	0.721053	0.721053	0.721053	0.721053	0.721053	0.721053	0.721053
		15	0.734211	0.62367	0	0.340693	0.523295	0.621165	0.673621	0.701736	0.716805	0.724882	0.729211	0.731531	0.732774	0.733441	0.733798	0.733989	0.734092	0.734147	0.734176	0.734192	0.734201	0.734205	0.734208	0.734209	0.73421	0.73421	0.73421	0.73421	0.73421	0.73421	0.734211	0.734211	0.734211	0.734211	0.734211	0.734211	0.734211	0.734211	0.734211	0.734211	0.734211	0.734211	0.734211	0.734211	0.734211	0.734211	0.734211
		16	0.747368	0.62589	0	0.347687	0.533625	0.633061	0.686239	0.714677	0.729886	0.738019	0.742368	0.744694	0.745938	0.746604	0.746959	0.74715	0.747251	0.747306	0.747335	0.747351	0.747359	0.747363	0.747366	0.747367	0.747368	0.747368	0.747368	0.747368	0.747368	0.747368	0.747368	0.747368	0.747368	0.747368	0.747368	0.747368	0.747368	0.747368	0.747368	0.747368	0.747368	0.747368	0.747368	0.747368	0.747368	0.747368	0.747368
		17	0.760526	0.628072	0	0.354694	0.543966	0.644966	0.698861	0.72762	0.742967	0.751156	0.755526	0.757858	0.759103	0.759767	0.760121	0.76031	0.760411	0.760465	0.760493	0.760509	0.760517	0.760521	0.760524	0.760525	0.760526	0.760526	0.760526	0.760526	0.760526	0.760526	0.760526	0.760526	0.760526	0.760526	0.760526	0.760526	0.760526	0.760526	0.760526	0.760526	0.760526	0.760526	0.760526	0.760526	0.760526	0.760526	0.760526
		18	0.773684	0.630216	0	0.361715	0.55432	0.656878	0.711488	0.740566	0.756049	0.764294	0.768684	0.771022	0.772267	0.772929	0.773282	0.77347	0.77357	0.773624	0.773652	0.773667	0.773675	0.773679	0.773682	0.773683	0.773683	0.773684	0.773684	0.773684	0.773684	0.773684	0.773684	0.773684	0.773684	0.773684	0.773684	0.773684	0.773684	0.773684	0.773684	0.773684	0.773684	0.773684	0.773684	0.773684	0.773684	0.773684	0.773684
		19	0.786842	0.632324	0	0.368749	0.564686	0.668798	0.724119	0.753514	0.769133	0.777432	0.781842	0.784185	0.78543	0.786092	0.786444	0.78663	0.78673	0.786782	0.78681	0.786825	0.786833	0.786837	0.78684	0.786841	0.786841	0.786842	0.786842	0.786842	0.786842	0.786842	0.786842	0.786842	0.786842	0.786842	0.786842	0.786842	0.786842	0.786842	0.786842	0.786842	0.786842	0.786842	0.786842	0.786842	0.786842	0.786842	0.786842
		20	0.8	0.634397	0	0.375796	0.575063	0.680726	0.736754	0.766464	0.782217	0.790571	0.795	0.797349	0.798594	0.799255	0.799605	0.79979	0.799889	0.799941	0.799969	0.799983	0.799991	0.799995	0.799998	0.799999	0.799999	0.8	0.8	0.8	0.8	0.8	0.8	0.8	0.8	0.8	0.8	0.8	0.8	0.8	0.8	0.8	0.8	0.8	0.8	0.8	0.8	0.8	0.8
[truncated: 311 more columns]

## Sheet: Revenue and operating cost mode
	revenue	integriert
		Cluster	Households	1	2	3	4	5	6	7	8	9	10	11	12	13	14	15	16	17	18	19	20	21	22	23	24	25	26	27	28	29	30	31	32	33	34	35	36	37	38	39	40	41	42	43	44	45	46
		1	2038700	2.69032e+08	4.18528e+08	5.01601e+08	5.47762e+08	5.73414e+08	5.87667e+08	5.95588e+08	599989410	6.02435e+08	6.03794e+08	6.04549e+08	6.04969e+08	6.05202e+08	6.05332e+08	6.05404e+08	6.05444e+08	6.05466e+08	6.05478e+08	6.05485e+08	6.05489e+08	6.05491e+08	6.05492e+08	6.05493e+08	6.05493e+08	6.05494e+08	6.05494e+08	6.05494e+08	6.05494e+08	6.05494e+08	6.05494e+08	6.05494e+08	6.05494e+08	6.05494e+08	6.05494e+08	6.05494e+08	6.05494e+08	6.05494e+08	6.05494e+08	6.05494e+08	6.05494e+08	6.05494e+08	6.05494e+08	6.05494e+08	6.05494e+08	6.05494e+08	6.05494e+08
		2	2038700	2.76485e+08	4.29669e+08	5.1454e+08	5.61561e+08	5.87613e+08	6.02047e+08	6.10044e+08	6.14475e+08	6.1693e+08	6.1829e+08	6.19043e+08	6.19461e+08	6.19692e+08	6.1982e+08	6.19891e+08	6.19931e+08	6.19952e+08	6.19964e+08	6.19971e+08	6.19975e+08	6.19977e+08	6.19978e+08	6.19979e+08	6.19979e+08	6.19979e+08	6.19979e+08	6.19979e+08	6.19979e+08	6.19979e+08	6.19979e+08	6.19979e+08	6.19979e+08	6.19979e+08	6.19979e+08	6.19979e+08	6.19979e+08	6.19979e+08	6.19979e+08	6.19979e+08	6.19979e+08	6.19979e+08	6.19979e+08	6.19979e+08	6.19979e+08	6.19979e+08	6.19979e+08
		3	2038700	2.83958e+08	4.40829e+08	5.27492e+08	5.75368e+08	6.01817e+08	6.16429e+08	6.24501e+08	6.2896e+08	6.31424e+08	6.32785e+08	6.33537e+08	6.33952e+08	6.34182e+08	6.34308e+08	6.34378e+08	6.34417e+08	6.34439e+08	6.3445e+08	6.34457e+08	6.3446e+08	6.34462e+08	6.34464e+08	6.34464e+08	6.34464e+08	6.34465e+08	6.34465e+08	6.34465e+08	6.34465e+08	6.34465e+08	6.34465e+08	6.34465e+08	6.34465e+08	6.34465e+08	6.34465e+08	6.34465e+08	6.34465e+08	6.34465e+08	6.34465e+08	6.34465e+08	6.34465e+08	6.34465e+08	6.34465e+08	6.34465e+08	6.34465e+08	6.34465e+08	6.34465e+08
		4	2038700	2.91452e+08	4.52009e+08	5.40458e+08	5.89183e+08	6.16025e+08	6.30812e+08	6.38958e+08	6.43446e+08	6.45918e+08	6.4728e+08	6.4803e+08	6.48443e+08	6.48671e+08	6.48797e+08	6.48866e+08	6.48904e+08	6.48925e+08	6.48936e+08	6.48943e+08	6.48946e+08	6.48948e+08	6.48949e+08	6.4895e+08	6.4895e+08	6.4895e+08	6.4895e+08	6.4895e+08	6.4895e+08	6.4895e+08	6.4895e+08	6.4895e+08	6.4895e+08	6.4895e+08	6.4895e+08	6.4895e+08	6.4895e+08	6.4895e+08	6.4895e+08	6.4895e+08	6.4895e+08	6.4895e+08	6.4895e+08	6.4895e+08	6.4895e+08	6.4895e+08	6.4895e+08
		5	2038700	2.98964e+08	4.63206e+08	5.53436e+08	6.03005e+08	6.30237e+08	6.45197e+08	6.53416e+08	6.57931e+08	6.60412e+08	6.61775e+08	6.62523e+08	6.62935e+08	6.6316e+08	6.63285e+08	6.63353e+08	6.6339e+08	6.63411e+08	6.63422e+08	6.63428e+08	6.63432e+08	6.63434e+08	6.63435e+08	6.63435e+08	6.63436e+08	6.63436e+08	6.63436e+08	6.63436e+08	6.63436e+08	6.63436e+08	6.63436e+08	6.63436e+08	6.63436e+08	6.63436e+08	6.63436e+08	6.63436e+08	6.63436e+08	6.63436e+08	6.63436e+08	6.63436e+08	6.63436e+08	6.63436e+08	6.63436e+08	6.63436e+08	6.63436e+08	6.63436e+08	6.63436e+08
		6	2038700	3.06496e+08	4.74422e+08	5.66426e+08	6.16834e+08	6.44453e+08	6.59584e+08	6.67875e+08	6.72417e+08	6.74906e+08	6.76269e+08	6.77016e+08	6.77425e+08	6.7765e+08	6.77773e+08	6.7784e+08	6.77877e+08	6.77897e+08	6.77908e+08	6.77914e+08	6.77917e+08	6.77919e+08	6.7792e+08	6.77921e+08	6.77921e+08	6.77921e+08	6.77921e+08	6.77921e+08	6.77921e+08	6.77921e+08	6.77921e+08	6.77921e+08	6.77921e+08	6.77921e+08	6.77921e+08	6.77921e+08	6.77921e+08	6.77921e+08	6.77921e+08	6.77921e+08	6.77921e+08	6.77921e+08	6.77921e+08	6.77921e+08	6.77921e+08	6.77921e+08	6.77921e+08
		7	2038700	3.14046e+08	4.85655e+08	5.79429e+08	6.30671e+08	6.58672e+08	6.73973e+08	6.82334e+08	6.86902e+08	6.89399e+08	6.90763e+08	6.91509e+08	6.91916e+08	6.92139e+08	6.9226e+08	6.92327e+08	6.92363e+08	6.92383e+08	6.92394e+08	6.924e+08	6.92403e+08	6.92405e+08	6.92406e+08	6.92406e+08	6.92407e+08	6.92407e+08	6.92407e+08	6.92407e+08	6.92407e+08	6.92407e+08	6.92407e+08	6.92407e+08	6.92407e+08	6.92407e+08	6.92407e+08	6.92407e+08	6.92407e+08	6.92407e+08	6.92407e+08	6.92407e+08	6.92407e+08	6.92407e+08	6.92407e+08	6.92407e+08	6.92407e+08	6.92407e+08	6.92407e+08
		8	2038700	3.21615e+08	4.96905e+08	5.92443e+08	6.44514e+08	6.72894e+08	6.88362e+08	6.96793e+08	7.01388e+08	7.03892e+08	7.05257e+08	7.06001e+08	7.06407e+08	7.06628e+08	7.06748e+08	7.06814e+08	7.0685e+08	7.06869e+08	7.0688e+08	7.06885e+08	7.06889e+08	7.0689e+08	7.06891e+08	7.06892e+08	7.06892e+08	7.06892e+08	7.06892e+08	7.06892e+08	7.06892e+08	7.06892e+08	7.06892e+08	7.06892e+08	7.06892e+08	7.06892e+08	7.06892e+08	7.06892e+08	7.06892e+08	7.06892e+08	7.06892e+08	7.06892e+08	7.06892e+08	7.06892e+08	7.06892e+08	7.06892e+08	7.06892e+08	7.06892e+08	7.06892e+08
		9	2038700	3.29201e+08	5.08171e+08	6.05468e+08	6.58363e+08	6.8712e+08	7.02754e+08	7.11253e+08	7.15873e+08	7.18385e+08	7.19751e+08	7.20493e+08	7.20897e+08	7.21116e+08	7.21236e+08	7.21301e+08	7.21336e+08	7.21355e+08	7.21365e+08	7.21371e+08	7.21374e+08	7.21376e+08	7.21377e+08	7.21377e+08	7.21378e+08	7.21378e+08	7.21378e+08	7.21378e+08	7.21378e+08	7.21378e+08	7.21378e+08	7.21378e+08	7.21378e+08	7.21378e+08	7.21378e+08	7.21378e+08	7.21378e+08	7.21378e+08	7.21378e+08	7.21378e+08	7.21378e+08	7.21378e+08	7.21378e+08	7.21378e+08	7.21378e+08	7.21378e+08	7.21378e+08
		10	2038700	3.36804e+08	5.19453e+08	6.18504e+08	6.72219e+08	7.01349e+08	7.17146e+08	7.25713e+08	7.30359e+08	7.32878e+08	7.34245e+08	7.34986e+08	7.35387e+08	7.35605e+08	7.35723e+08	7.35787e+08	7.35822e+08	7.35841e+08	7.35851e+08	7.35857e+08	7.3586e+08	7.35861e+08	7.35862e+08	7.35863e+08	7.35863e+08	7.35863e+08	7.35863e+08	7.35863e+08	7.35863e+08	7.35863e+08	7.35863e+08	7.35863e+08	7.35863e+08	7.35863e+08	7.35863e+08	7.35863e+08	7.35863e+08	7.35863e+08	7.35863e+08	7.35863e+08	7.35863e+08	7.35863e+08	7.35863e+08	7.35863e+08	7.35863e+08	7.35863e+08	7.35863e+08
		11	2038700	3.44425e+08	5.30752e+08	6.31551e+08	6.86082e+08	7.15582e+08	7.3154e+08	7.40174e+08	7.44844e+08	7.47371e+08	7.48738e+08	7.49477e+08	7.49877e+08	7.50094e+08	7.50211e+08	7.50274e+08	7.50309e+08	7.50327e+08	7.50337e+08	7.50343e+08	7.50345e+08	7.50347e+08	7.50348e+08	7.50348e+08	7.50349e+08	7.50349e+08	7.50349e+08	7.50349e+08	7.50349e+08	7.50349e+08	7.50349e+08	7.50349e+08	7.50349e+08	7.50349e+08	7.50349e+08	7.50349e+08	7.50349e+08	7.50349e+08	7.50349e+08	7.50349e+08	7.50349e+08	7.50349e+08	7.50349e+08	7.50349e+08	7.50349e+08	7.50349e+08	7.50349e+08
		12	2038700	3.52062e+08	5.42065e+08	6.44608e+08	6.9995e+08	7.29817e+08	7.45936e+08	7.54635e+08	7.5933e+08	7.61864e+08	7.63231e+08	7.63969e+08	7.64367e+08	7.64582e+08	7.64698e+08	7.64761e+08	7.64795e+08	7.64813e+08	7.64823e+08	7.64828e+08	7.64831e+08	7.64833e+08	7.64833e+08	7.64834e+08	7.64834e+08	7.64834e+08	7.64834e+08	7.64834e+08	7.64834e+08	7.64834e+08	7.64834e+08	7.64834e+08	7.64834e+08	7.64834e+08	7.64834e+08	7.64834e+08	7.64834e+08	7.64834e+08	7.64834e+08	7.64834e+08	7.64834e+08	7.64834e+08	7.64834e+08	7.64834e+08	7.64834e+08	7.64834e+08	7.64834e+08
		13	2038700	3.59715e+08	5.53394e+08	6.57676e+08	7.13824e+08	7.44055e+08	7.60332e+08	7.69097e+08	7.73815e+08	7.76356e+08	7.77724e+08	7.78461e+08	7.78857e+08	7.79071e+08	7.79186e+08	7.79248e+08	7.79281e+08	7.79299e+08	7.79309e+08	7.79314e+08	7.79317e+08	7.79318e+08	7.79319e+08	7.79319e+08	7.7932e+08	7.7932e+08	7.7932e+08	7.7932e+08	7.7932e+08	7.7932e+08	7.7932e+08	7.7932e+08	7.7932e+08	7.7932e+08	7.7932e+08	7.7932e+08	7.7932e+08	7.7932e+08	7.7932e+08	7.7932e+08	7.7932e+08	7.7932e+08	7.7932e+08	7.7932e+08	7.7932e+08	7.7932e+08	7.7932e+08
		14	2038700	3.67384e+08	5.64737e+08	6.70753e+08	7.27703e+08	7.58296e+08	7.7473e+08	7.83559e+08	7.88301e+08	7.90848e+08	7.92217e+08	7.92952e+08	7.93347e+08	7.93559e+08	7.93673e+08	7.93734e+08	7.93767e+08	7.93785e+08	7.93794e+08	7.93799e+08	7.93802e+08	7.93804e+08	7.93804e+08	7.93805e+08	7.93805e+08	7.93805e+08	7.93805e+08	7.93805e+08	7.93805e+08	7.93805e+08	7.93805e+08	7.93805e+08	7.93805e+08	7.93805e+08	7.93805e+08	7.93805e+08	7.93805e+08	7.93805e+08	7.93805e+08	7.93805e+08	7.93805e+08	7.93805e+08	7.93805e+08	7.93805e+08	7.93805e+08	7.93805e+08	7.93805e+08
		15	2038700	3.75068e+08	5.76095e+08	6.8384e+08	7.41588e+08	7.7254e+08	7.89129e+08	7.98021e+08	8.02786e+08	8.05341e+08	8.0671e+08	8.07443e+08	8.07837e+08	8.08047e+08	8.0816e+08	8.08221e+08	8.08253e+08	8.08271e+08	8.0828e+08	8.08285e+08	8.08288e+08	8.08289e+08	8.0829e+08	8.0829e+08	8.08291e+08	8.08291e+08	8.08291e+08	8.08291e+08	8.08291e+08	8.08291e+08	8.08291e+08	8.08291e+08	8.08291e+08	8.08291e+08	8.08291e+08	8.08291e+08	8.08291e+08	8.08291e+08	8.08291e+08	8.08291e+08	8.08291e+08	8.08291e+08	8.08291e+08	8.08291e+08	8.08291e+08	8.08291e+08	8.08291e+08
		16	2038700	3.82768e+08	5.87466e+08	6.96936e+08	7.55479e+08	7.86787e+08	8.0353e+08	8.12484e+08	8.17272e+08	8.19833e+08	8.21202e+08	8.21935e+08	8.22326e+08	8.22536e+08	8.22648e+08	8.22708e+08	8.2274e+08	8.22757e+08	8.22766e+08	8.22771e+08	8.22773e+08	8.22775e+08	8.22776e+08	8.22776e+08	8.22776e+08	8.22776e+08	8.22776e+08	8.22776e+08	8.22776e+08	8.22776e+08	8.22776e+08	8.22776e+08	8.22776e+08	8.22776e+08	8.22776e+08	8.22776e+08	8.22776e+08	8.22776e+08	8.22776e+08	8.22776e+08	8.22776e+08	8.22776e+08	8.22776e+08	8.22776e+08	8.22776e+08	8.22776e+08	8.22776e+08
		17	2038700	3.90482e+08	5.98851e+08	7.10041e+08	7.69374e+08	8.01036e+08	8.17931e+08	8.26947e+08	8.31757e+08	8.34325e+08	8.35694e+08	8.36426e+08	8.36816e+08	8.37024e+08	8.37135e+08	8.37194e+08	8.37226e+08	8.37243e+08	8.37252e+08	8.37256e+08	8.37259e+08	8.3726e+08	8.37261e+08	8.37261e+08	8.37262e+08	8.37262e+08	8.37262e+08	8.37262e+08	8.37262e+08	8.37262e+08	8.37262e+08	8.37262e+08	8.37262e+08	8.37262e+08	8.37262e+08	8.37262e+08	8.37262e+08	8.37262e+08	8.37262e+08	8.37262e+08	8.37262e+08	8.37262e+08	8.37262e+08	8.37262e+08	8.37262e+08	8.37262e+08	8.37262e+08
		18	2038700	3.98212e+08	6.1025e+08	7.23156e+08	7.83275e+08	8.15288e+08	8.32333e+08	8.4141e+08	8.46243e+08	8.48816e+08	8.50187e+08	8.50916e+08	8.51305e+08	8.51512e+08	8.51622e+08	8.51681e+08	8.51712e+08	8.51728e+08	8.51737e+08	8.51742e+08	8.51745e+08	8.51746e+08	8.51747e+08	8.51747e+08	8.51747e+08	8.51747e+08	8.51747e+08	8.51747e+08	8.51747e+08	8.51747e+08	8.51747e+08	8.51747e+08	8.51747e+08	8.51747e+08	8.51747e+08	8.51747e+08	8.51747e+08	8.51747e+08	8.51747e+08	8.51747e+08	8.51747e+08	8.51747e+08	8.51747e+08	8.51747e+08	8.51747e+08	8.51747e+08	8.51747e+08
		19	2038700	4.05955e+08	6.21662e+08	7.36279e+08	7.97181e+08	8.29542e+08	8.46737e+08	8.55874e+08	8.60728e+08	8.63308e+08	8.64679e+08	8.65407e+08	8.65794e+08	8.66e+08	8.66109e+08	8.66167e+08	8.66198e+08	8.66214e+08	8.66223e+08	8.66228e+08	8.6623e+08	8.66231e+08	8.66232e+08	8.66232e+08	8.66233e+08	8.66233e+08	8.66233e+08	8.66233e+08	8.66233e+08	8.66233e+08	8.66233e+08	8.66233e+08	8.66233e+08	8.66233e+08	8.66233e+08	8.66233e+08	8.66233e+08	8.66233e+08	8.66233e+08	8.66233e+08	8.66233e+08	8.66233e+08	8.66233e+08	8.66233e+08	8.66233e+08	8.66233e+08	8.66233e+08
		20	2038700	4.13713e+08	6.33086e+08	7.4941e+08	8.11091e+08	8.43798e+08	8.61141e+08	8.70338e+08	875213910	8.778e+08	8.79171e+08	8.79898e+08	8.80283e+08	8.80488e+08	8.80596e+08	8.80654e+08	8.80684e+08	8.807e+08	8.80709e+08	8.80713e+08	8.80716e+08	8.80717e+08	8.80718e+08	8.80718e+08	8.80718e+08	8.80718e+08	8.80718e+08	8.80718e+08	8.80718e+08	8.80718e+08	8.80718e+08	8.80718e+08	8.80718e+08	8.80718e+08	8.80718e+08	8.80718e+08	8.80718e+08	8.80718e+08	8.80718e+08	8.80718e+08	8.80718e+08	8.80718e+08	8.80718e+08	8.80718e+08	8.80718e+08	8.80718e+08	8.80718e+08
	revenue	wholesale only
		Cluster		1	2	3	4	5	6	7	8	9	10	11	12	13	14	15	16	17	18	19	20	21	22	23	24	25	26	27	28	29	30	31	32	33	34	35	36	37	38	39	40	41	42	43	44	45	46
		1	2038700	2.09247e+08	3.25522e+08	3.90134e+08	4.26037e+08	4.45988e+08	4.57075e+08	4.63235e+08	466658430	4.68561e+08	4.69618e+08	4.70205e+08	4.70531e+08	4.70713e+08	4.70814e+08	4.7087e+08	4.70901e+08	4.70918e+08	4.70928e+08	4.70933e+08	4.70936e+08	4.70938e+08	4.70939e+08	4.70939e+08	4.70939e+08	4.7094e+08	4.7094e+08	4.7094e+08	4.7094e+08	4.7094e+08	4.7094e+08	4.7094e+08	4.7094e+08	4.7094e+08	4.7094e+08	4.7094e+08	4.7094e+08	4.7094e+08	4.7094e+08	4.7094e+08	4.7094e+08	4.7094e+08	4.7094e+08	4.7094e+08	4.7094e+08	4.7094e+08	4.7094e+08
		2	2038700	2.15044e+08	3.34187e+08	4.00197e+08	4.3677e+08	4.57033e+08	4.68259e+08	4.74479e+08	4.77925e+08	4.79834e+08	4.80892e+08	4.81478e+08	4.81803e+08	4.81983e+08	4.82082e+08	4.82138e+08	4.82168e+08	4.82185e+08	4.82195e+08	4.822e+08	4.82203e+08	4.82204e+08	4.82205e+08	4.82206e+08	4.82206e+08	4.82206e+08	4.82206e+08	4.82206e+08	4.82206e+08	4.82206e+08	4.82206e+08	4.82206e+08	4.82206e+08	4.82206e+08	4.82206e+08	4.82206e+08	4.82206e+08	4.82206e+08	4.82206e+08	4.82206e+08	4.82206e+08	4.82206e+08	4.82206e+08	4.82206e+08	4.82206e+08	4.82206e+08	4.82206e+08
		3	2038700	2.20856e+08	3.42867e+08	4.10272e+08	4.47509e+08	4.6808e+08	4.79445e+08	4.85723e+08	4.89191e+08	4.91108e+08	4.92166e+08	4.92751e+08	4.93074e+08	4.93252e+08	4.93351e+08	4.93405e+08	4.93436e+08	4.93452e+08	4.93461e+08	4.93466e+08	4.93469e+08	4.93471e+08	4.93472e+08	4.93472e+08	4.93472e+08	4.93473e+08	4.93473e+08	4.93473e+08	4.93473e+08	4.93473e+08	4.93473e+08	4.93473e+08	4.93473e+08	4.93473e+08	4.93473e+08	4.93473e+08	4.93473e+08	4.93473e+08	4.93473e+08	4.93473e+08	4.93473e+08	4.93473e+08	4.93473e+08	4.93473e+08	4.93473e+08	4.93473e+08	4.93473e+08
		4	2038700	2.26685e+08	3.51562e+08	4.20356e+08	4.58253e+08	4.79131e+08	4.90632e+08	4.96968e+08	5.00458e+08	5.02381e+08	5.0344e+08	5.04023e+08	5.04345e+08	5.04522e+08	5.0462e+08	5.04673e+08	5.04703e+08	5.04719e+08	5.04728e+08	5.04733e+08	5.04736e+08	5.04737e+08	5.04738e+08	5.04739e+08	5.04739e+08	5.04739e+08	5.04739e+08	5.04739e+08	5.04739e+08	5.04739e+08	5.04739e+08	5.04739e+08	5.04739e+08	5.04739e+08	5.04739e+08	5.04739e+08	5.04739e+08	5.04739e+08	5.04739e+08	5.04739e+08	5.04739e+08	5.04739e+08	5.04739e+08	5.04739e+08	5.04739e+08	5.04739e+08	5.04739e+08
		5	2038700	2.32528e+08	3.60271e+08	4.3045e+08	4.69004e+08	4.90184e+08	5.0182e+08	5.08213e+08	5.11724e+08	5.13654e+08	5.14714e+08	5.15296e+08	5.15616e+08	5.15791e+08	5.15888e+08	5.15941e+08	5.1597e+08	5.15986e+08	5.15995e+08	5.16e+08	5.16002e+08	5.16004e+08	5.16005e+08	5.16005e+08	5.16005e+08	5.16006e+08	5.16006e+08	5.16006e+08	5.16006e+08	5.16006e+08	5.16006e+08	5.16006e+08	5.16006e+08	5.16006e+08	5.16006e+08	5.16006e+08	5.16006e+08	5.16006e+08	5.16006e+08	5.16006e+08	5.16006e+08	5.16006e+08	5.16006e+08	5.16006e+08	5.16006e+08	5.16006e+08	5.16006e+08
		6	2038700	2.38386e+08	3.68995e+08	4.40554e+08	4.7976e+08	5.01241e+08	5.1301e+08	5.19458e+08	5.22991e+08	5.24927e+08	5.25987e+08	5.26568e+08	5.26886e+08	5.27061e+08	5.27156e+08	5.27209e+08	5.27237e+08	5.27253e+08	5.27262e+08	5.27266e+08	5.27269e+08	5.2727e+08	5.27271e+08	5.27272e+08	5.27272e+08	5.27272e+08	5.27272e+08	5.27272e+08	5.27272e+08	5.27272e+08	5.27272e+08	5.27272e+08	5.27272e+08	5.27272e+08	5.27272e+08	5.27272e+08	5.27272e+08	5.27272e+08	5.27272e+08	5.27272e+08	5.27272e+08	5.27272e+08	5.27272e+08	5.27272e+08	5.27272e+08	5.27272e+08	5.27272e+08
		7	2038700	2.44258e+08	3.77731e+08	4.50667e+08	4.90522e+08	5.123e+08	5.24201e+08	5.30704e+08	5.34257e+08	5.36199e+08	5.3726e+08	5.3784e+08	5.38157e+08	5.3833e+08	5.38425e+08	5.38476e+08	5.38505e+08	5.3852e+08	5.38529e+08	5.38533e+08	5.38536e+08	5.38537e+08	5.38538e+08	5.38538e+08	5.38538e+08	5.38539e+08	5.38539e+08	5.38539e+08	5.38539e+08	5.38539e+08	5.38539e+08	5.38539e+08	5.38539e+08	5.38539e+08	5.38539e+08	5.38539e+08	5.38539e+08	5.38539e+08	5.38539e+08	5.38539e+08	5.38539e+08	5.38539e+08	5.38539e+08	5.38539e+08	5.38539e+08	5.38539e+08	5.38539e+08
		8	2038700	2.50145e+08	3.86481e+08	4.60789e+08	5.01289e+08	5.23362e+08	5.35393e+08	5.4195e+08	5.45524e+08	5.47472e+08	5.48533e+08	5.49112e+08	5.49427e+08	5.49599e+08	5.49693e+08	5.49744e+08	5.49772e+08	5.49787e+08	5.49795e+08	5.498e+08	5.49802e+08	5.49804e+08	5.49804e+08	5.49805e+08	5.49805e+08	5.49805e+08	5.49805e+08	5.49805e+08	5.49805e+08	5.49805e+08	5.49805e+08	5.49805e+08	5.49805e+08	5.49805e+08	5.49805e+08	5.49805e+08	5.49805e+08	5.49805e+08	5.49805e+08	5.49805e+08	5.49805e+08	5.49805e+08	5.49805e+08	5.49805e+08	5.49805e+08	5.49805e+08	5.49805e+08
		9	2038700	2.56045e+08	3.95244e+08	4.7092e+08	5.1206e+08	5.34427e+08	5.46586e+08	5.53197e+08	5.5679e+08	5.58744e+08	5.59806e+08	5.60384e+08	5.60698e+08	5.60868e+08	5.60961e+08	5.61012e+08	5.61039e+08	5.61054e+08	5.61062e+08	5.61066e+08	5.61069e+08	5.6107e+08	5.61071e+08	5.61071e+08	5.61071e+08	5.61072e+08	5.61072e+08	5.61072e+08	5.61072e+08	5.61072e+08	5.61072e+08	5.61072e+08	5.61072e+08	5.61072e+08	5.61072e+08	5.61072e+08	5.61072e+08	5.61072e+08	5.61072e+08	5.61072e+08	5.61072e+08	5.61072e+08	5.61072e+08	5.61072e+08	5.61072e+08	5.61072e+08	5.61072e+08
		10	2038700	2.61959e+08	4.04019e+08	4.81059e+08	5.22837e+08	5.45494e+08	5.57781e+08	5.64444e+08	5.68057e+08	5.70016e+08	5.71079e+08	5.71655e+08	5.71968e+08	5.72137e+08	5.72229e+08	5.72279e+08	5.72306e+08	5.72321e+08	5.72329e+08	5.72333e+08	5.72335e+08	5.72337e+08	5.72337e+08	5.72338e+08	5.72338e+08	5.72338e+08	5.72338e+08	5.72338e+08	5.72338e+08	5.72338e+08	5.72338e+08	5.72338e+08	5.72338e+08	5.72338e+08	5.72338e+08	5.72338e+08	5.72338e+08	5.72338e+08	5.72338e+08	5.72338e+08	5.72338e+08	5.72338e+08	5.72338e+08	5.72338e+08	5.72338e+08	5.72338e+08	5.72338e+08
		11	2038700	2.67886e+08	4.12807e+08	4.91206e+08	5.33619e+08	5.56563e+08	5.68976e+08	5.75691e+08	5.79323e+08	5.81289e+08	5.82352e+08	5.82927e+08	5.83238e+08	5.83406e+08	5.83497e+08	5.83547e+08	5.83573e+08	5.83588e+08	5.83596e+08	5.836e+08	5.83602e+08	5.83603e+08	5.83604e+08	5.83604e+08	5.83604e+08	5.83605e+08	5.83605e+08	5.83605e+08	5.83605e+08	5.83605e+08	5.83605e+08	5.83605e+08	5.83605e+08	5.83605e+08	5.83605e+08	5.83605e+08	5.83605e+08	5.83605e+08	5.83605e+08	5.83605e+08	5.83605e+08	5.83605e+08	5.83605e+08	5.83605e+08	5.83605e+08	5.83605e+08	5.83605e+08
		12	2038700	2.73826e+08	4.21606e+08	5.01362e+08	5.44405e+08	5.67635e+08	5.80172e+08	5.86938e+08	5.9059e+08	5.92561e+08	5.93624e+08	5.94198e+08	5.94508e+08	5.94675e+08	5.94765e+08	5.94814e+08	5.9484e+08	5.94855e+08	5.94862e+08	5.94866e+08	5.94869e+08	5.9487e+08	5.9487e+08	5.94871e+08	5.94871e+08	5.94871e+08	5.94871e+08	5.94871e+08	5.94871e+08	5.94871e+08	5.94871e+08	5.94871e+08	5.94871e+08	5.94871e+08	5.94871e+08	5.94871e+08	5.94871e+08	5.94871e+08	5.94871e+08	5.94871e+08	5.94871e+08	5.94871e+08	5.94871e+08	5.94871e+08	5.94871e+08	5.94871e+08	5.94871e+08
		13	2038700	2.79778e+08	4.30418e+08	5.11526e+08	5.55196e+08	5.7871e+08	5.9137e+08	5.98186e+08	6.01856e+08	6.03833e+08	6.04897e+08	6.05469e+08	6.05778e+08	6.05944e+08	6.06033e+08	6.06082e+08	6.06107e+08	6.06121e+08	6.06129e+08	6.06133e+08	6.06135e+08	6.06136e+08	6.06137e+08	6.06137e+08	6.06137e+08	6.06138e+08	6.06138e+08	6.06138e+08	6.06138e+08	6.06138e+08	6.06138e+08	6.06138e+08	6.06138e+08	6.06138e+08	6.06138e+08	6.06138e+08	6.06138e+08	6.06138e+08	6.06138e+08	6.06138e+08	6.06138e+08	6.06138e+08	6.06138e+08	6.06138e+08	6.06138e+08	6.06138e+08	6.06138e+08
		14	2038700	2.85743e+08	4.3924e+08	5.21697e+08	5.65991e+08	5.89786e+08	6.02568e+08	6.09434e+08	6.13123e+08	6.15104e+08	6.16169e+08	6.16741e+08	6.17048e+08	6.17213e+08	6.17301e+08	6.17349e+08	6.17375e+08	6.17388e+08	6.17396e+08	6.174e+08	6.17402e+08	6.17403e+08	6.17403e+08	6.17404e+08	6.17404e+08	6.17404e+08	6.17404e+08	6.17404e+08	6.17404e+08	6.17404e+08	6.17404e+08	6.17404e+08	6.17404e+08	6.17404e+08	6.17404e+08	6.17404e+08	6.17404e+08	6.17404e+08	6.17404e+08	6.17404e+08	6.17404e+08	6.17404e+08	6.17404e+08	6.17404e+08	6.17404e+08	6.17404e+08	6.17404e+08
		15	2038700	2.9172e+08	4.48074e+08	5.31875e+08	5.76791e+08	6.00865e+08	6.13767e+08	6.20683e+08	6.24389e+08	6.26376e+08	6.27441e+08	6.28012e+08	6.28317e+08	6.28481e+08	6.28569e+08	6.28616e+08	6.28642e+08	6.28655e+08	6.28662e+08	6.28666e+08	6.28668e+08	6.28669e+08	6.2867e+08	6.2867e+08	6.28671e+08	6.28671e+08	6.28671e+08	6.28671e+08	6.28671e+08	6.28671e+08	6.28671e+08	6.28671e+08	6.28671e+08	6.28671e+08	6.28671e+08	6.28671e+08	6.28671e+08	6.28671e+08	6.28671e+08	6.28671e+08	6.28671e+08	6.28671e+08	6.28671e+08	6.28671e+08	6.28671e+08	6.28671e+08	6.28671e+08
		16	2038700	2.97708e+08	4.56918e+08	5.42061e+08	5.87595e+08	6.11945e+08	6.24967e+08	6.31932e+08	6.35656e+08	6.37648e+08	6.38713e+08	6.39282e+08	6.39587e+08	6.3975e+08	6.39837e+08	6.39884e+08	6.39909e+08	6.39922e+08	6.39929e+08	6.39933e+08	6.39935e+08	6.39936e+08	6.39937e+08	6.39937e+08	6.39937e+08	6.39937e+08	6.39937e+08	6.39937e+08	6.39937e+08	6.39937e+08	6.39937e+08	6.39937e+08	6.39937e+08	6.39937e+08	6.39937e+08	6.39937e+08	6.39937e+08	6.39937e+08	6.39937e+08	6.39937e+08	6.39937e+08	6.39937e+08	6.39937e+08	6.39937e+08	6.39937e+08	6.39937e+08	6.39937e+08
		17	2038700	3.03708e+08	4.65773e+08	5.52254e+08	5.98402e+08	6.23028e+08	6.36169e+08	6.43181e+08	6.46922e+08	6.48919e+08	6.49985e+08	6.50553e+08	6.50857e+08	6.51018e+08	6.51105e+08	6.51151e+08	6.51176e+08	6.51189e+08	6.51196e+08	6.51199e+08	6.51201e+08	6.51202e+08	6.51203e+08	6.51203e+08	6.51204e+08	6.51204e+08	6.51204e+08	6.51204e+08	6.51204e+08	6.51204e+08	6.51204e+08	6.51204e+08	6.51204e+08	6.51204e+08	6.51204e+08	6.51204e+08	6.51204e+08	6.51204e+08	6.51204e+08	6.51204e+08	6.51204e+08	6.51204e+08	6.51204e+08	6.51204e+08	6.51204e+08	6.51204e+08	6.51204e+08
		18	2038700	3.0972e+08	4.74639e+08	5.62454e+08	6.09214e+08	6.34113e+08	6.4737e+08	6.5443e+08	6.58189e+08	6.60191e+08	6.61256e+08	6.61824e+08	6.62126e+08	6.62287e+08	6.62373e+08	6.62418e+08	6.62443e+08	6.62455e+08	6.62462e+08	6.62466e+08	6.62468e+08	6.62469e+08	6.6247e+08	6.6247e+08	6.6247e+08	6.6247e+08	6.6247e+08	6.6247e+08	6.6247e+08	6.6247e+08	6.6247e+08	6.6247e+08	6.6247e+08	6.6247e+08	6.6247e+08	6.6247e+08	6.6247e+08	6.6247e+08	6.6247e+08	6.6247e+08	6.6247e+08	6.6247e+08	6.6247e+08	6.6247e+08	6.6247e+08	6.6247e+08	6.6247e+08
		19	2038700	3.15743e+08	4.83515e+08	5.72661e+08	6.2003e+08	6.45199e+08	6.58573e+08	6.65679e+08	6.69455e+08	6.71462e+08	6.72528e+08	6.73094e+08	6.73395e+08	6.73555e+08	6.7364e+08	6.73686e+08	6.73709e+08	6.73722e+08	6.73729e+08	6.73733e+08	6.73735e+08	6.73736e+08	6.73736e+08	6.73736e+08	6.73737e+08	6.73737e+08	6.73737e+08	6.73737e+08	6.73737e+08	6.73737e+08	6.73737e+08	6.73737e+08	6.73737e+08	6.73737e+08	6.73737e+08	6.73737e+08	6.73737e+08	6.73737e+08	6.73737e+08	6.73737e+08	6.73737e+08	6.73737e+08	6.73737e+08	6.73737e+08	6.73737e+08	6.73737e+08	6.73737e+08
		20	2038700	3.21777e+08	4.924e+08	5.82875e+08	6.30849e+08	6.56288e+08	6.69777e+08	6.76929e+08	680721930	6.82733e+08	6.83799e+08	6.84365e+08	6.84665e+08	6.84824e+08	6.84908e+08	6.84953e+08	6.84976e+08	6.84989e+08	6.84996e+08	6.84999e+08	6.85001e+08	6.85002e+08	6.85003e+08	6.85003e+08	6.85003e+08	6.85003e+08	6.85003e+08	6.85003e+08	6.85003e+08	6.85003e+08	6.85003e+08	6.85003e+08	6.85003e+08	6.85003e+08	6.85003e+08	6.85003e+08	6.85003e+08	6.85003e+08	6.85003e+08	6.85003e+08	6.85003e+08	6.85003e+08	6.85003e+08	6.85003e+08	6.85003e+08	6.85003e+08	6.85003e+08
	EBITDA diskontiert	integriert
		Cluster		1	2	3	4	5	6	7	8	9	10	11	12	13	14	15	16	17	18	19	20	21	22	23	24	25	26	27	28	29	30	31	32	33	34	35	36	37	38	39	40	41	42	43	44	45	46
	NPV	1	1.58318e+09	1.16248e+08	1.72234e+08	1.9659e+08	2.04459e+08	2.03842e+08	1.98961e+08	1.92041e+08	1.84247e+08	1.76189e+08	1.68178e+08	1.6037e+08	1.52839e+08	1.45617e+08	1.38713e+08	1.32123e+08	1.2584e+08	1.19852e+08	1.14147e+08	1.08712e+08	1.03536e+08	9.86064e+07	9.3911e+07	8.94391e+07	8.51802e+07	8.1124e+07	7.7261e+07	7.35819e+07	7.0078e+07	6.6741e+07	6.35628e+07	6.0536e+07	5.76533e+07	5.49079e+07	5.22933e+07	4.98031e+07	4.74316e+07	4.51729e+07	4.30218e+07	4.09732e+07	3.90221e+07	3.71639e+07	3.53942e+07	3.37087e+07	3.21035e+07	3.05748e+07	2.91189e+07
		2	1.78017e+09	1.19469e+08	1.76819e+08	2.01662e+08	2.0961e+08	2.0889e+08	2.0383e+08	1.96702e+08	1.88696e+08	1.80428e+08	1.72215e+08	1.64214e+08	1.565e+08	1.49103e+08	1.42033e+08	1.35285e+08	1.28851e+08	1.22719e+08	1.16878e+08	1.11313e+08	1.06013e+08	1.00965e+08	9.61577e+07	9.15788e+07	8.7218e+07	8.30648e+07	7.91093e+07	7.53422e+07	7.17545e+07	6.83376e+07	6.50835e+07	6.19842e+07	5.90326e+07	5.62215e+07	5.35443e+07	5.09946e+07	4.85663e+07	4.62536e+07	4.4051e+07	4.19534e+07	3.99556e+07	3.80529e+07	3.62409e+07	3.45151e+07	3.28716e+07	3.13063e+07	2.98155e+07
		3	1.89042e+09	1.22698e+08	1.81411e+08	2.06738e+08	2.14764e+08	2.13939e+08	2.08699e+08	2.01363e+08	1.93144e+08	1.84667e+08	1.76253e+08	1.68059e+08	1.60161e+08	1.5259e+08	1.45353e+08	1.38446e+08	1.31862e+08	1.25587e+08	1.19609e+08	1.13914e+08	1.0849e+08	1.03324e+08	9.84044e+07	9.37185e+07	8.92558e+07	8.50056e+07	8.09577e+07	7.71026e+07	7.3431e+07	6.99343e+07	6.66041e+07	6.34325e+07	6.04119e+07	5.75351e+07	5.47954e+07	5.21861e+07	4.9701e+07	4.73343e+07	4.50803e+07	4.29336e+07	4.08891e+07	3.8942e+07	3.70877e+07	3.53216e+07	3.36396e+07	3.20377e+07	3.05121e+07
		4	1.96452e+09	1.25936e+08	1.86012e+08	2.1182e+08	2.1992e+08	2.1899e+08	2.13568e+08	2.06025e+08	1.97592e+08	1.88906e+08	1.8029e+08	1.71904e+08	1.63822e+08	1.56076e+08	1.48673e+08	1.41608e+08	1.34873e+08	1.28454e+08	1.2234e+08	1.16515e+08	1.10967e+08	1.05683e+08	1.00651e+08	9.58582e+07	9.12936e+07	8.69463e+07	8.2806e+07	7.88629e+07	7.51075e+07	7.1531e+07	6.81247e+07	6.48807e+07	6.17911e+07	5.88487e+07	5.60464e+07	5.33775e+07	5.08357e+07	4.8415e+07	4.61095e+07	4.39138e+07	4.18227e+07	3.98311e+07	3.79344e+07	3.6128e+07	3.44076e+07	3.27692e+07	3.12087e+07
		5	2.05307e+09	1.29182e+08	1.9062e+08	2.16906e+08	2.2508e+08	2.24042e+08	2.18438e+08	2.10687e+08	2.02041e+08	1.93145e+08	1.84327e+08	1.75748e+08	1.67483e+08	1.59562e+08	1.51992e+08	1.4477e+08	1.37884e+08	1.31322e+08	1.25071e+08	1.19116e+08	1.13444e+08	1.08042e+08	1.02898e+08	9.79979e+07	9.33314e+07	8.88871e+07	8.46544e+07	8.06232e+07	7.6784e+07	7.31276e+07	6.96454e+07	6.63289e+07	6.31704e+07	6.01623e+07	5.72974e+07	5.4569e+07	5.19705e+07	4.94957e+07	4.71387e+07	4.4894e+07	4.27562e+07	4.07202e+07	3.87812e+07	3.69344e+07	3.51757e+07	3.35006e+07	3.19054e+07
		6	2.17055e+09	1.32437e+08	1.95235e+08	2.21997e+08	2.30242e+08	2.29096e+08	2.23309e+08	2.15349e+08	2.06489e+08	1.97384e+08	1.88364e+08	1.79593e+08	1.71144e+08	1.63048e+08	1.55312e+08	1.47931e+08	1.40895e+08	1.34189e+08	1.27801e+08	1.21717e+08	1.15921e+08	1.10401e+08	1.05144e+08	1.00138e+08	9.53692e+07	9.08279e+07	8.65027e+07	8.23836e+07	7.84605e+07	7.47243e+07	7.1166e+07	6.77772e+07	6.45497e+07	6.14759e+07	5.85485e+07	5.57604e+07	5.31052e+07	5.05764e+07	4.8168e+07	4.58743e+07	4.36898e+07	4.16093e+07	3.96279e+07	3.77409e+07	3.59437e+07	3.42321e+07	3.2602e+07
		7	2.26633e+09	1.35699e+08	1.99858e+08	2.27093e+08	2.35406e+08	2.3415e+08	2.28181e+08	2.20011e+08	2.10937e+08	2.01623e+08	1.92402e+08	1.83437e+08	1.74805e+08	1.66535e+08	1.58632e+08	1.51093e+08	1.43906e+08	1.37057e+08	1.30532e+08	1.24318e+08	1.18398e+08	1.12761e+08	1.07391e+08	1.02277e+08	9.7407e+07	9.27686e+07	8.83511e+07	8.41439e+07	8.0137e+07	7.6321e+07	7.26867e+07	6.92254e+07	6.59289e+07	6.27895e+07	5.97995e+07	5.69519e+07	5.42399e+07	5.16571e+07	4.91972e+07	4.68545e+07	4.46233e+07	4.24984e+07	4.04747e+07	3.85473e+07	3.67117e+07	3.49635e+07	3.32986e+07
		8	2.457e+09	1.38969e+08	2.04487e+08	2.32194e+08	2.40573e+08	2.39206e+08	2.33052e+08	2.24673e+08	2.15385e+08	2.05861e+08	1.96439e+08	1.87282e+08	1.78466e+08	1.70021e+08	1.61952e+08	1.54254e+08	1.46916e+08	1.39924e+08	1.33263e+08	1.26918e+08	1.20875e+08	1.1512e+08	1.09638e+08	1.04417e+08	9.94448e+07	9.47094e+07	9.01994e+07	8.59042e+07	8.18136e+07	7.79177e+07	7.42073e+07	7.06736e+07	6.73082e+07	6.41031e+07	6.10505e+07	5.81434e+07	5.53746e+07	5.27377e+07	5.02264e+07	4.78347e+07	4.55568e+07	4.33875e+07	4.13214e+07	3.93537e+07	3.74797e+07	3.5695e+07	3.39952e+07
		9	2.56092e+09	1.42247e+08	2.09124e+08	2.37299e+08	2.45743e+08	2.44263e+08	2.37925e+08	2.29335e+08	2.19834e+08	2.101e+08	2.00476e+08	1.91126e+08	1.82127e+08	1.73507e+08	1.65272e+08	1.57416e+08	1.49927e+08	1.42792e+08	1.35994e+08	1.29519e+08	1.23352e+08	1.17479e+08	1.11884e+08	1.06557e+08	1.01483e+08	9.66502e+07	9.20478e+07	8.76646e+07	8.34901e+07	7.95143e+07	7.57279e+07	7.21219e+07	6.86875e+07	6.54166e+07	6.23016e+07	5.93348e+07	5.65094e+07	5.38184e+07	5.12557e+07	4.88149e+07	4.64904e+07	4.42766e+07	4.21682e+07	4.01601e+07	3.82478e+07	3.64264e+07	3.46918e+07
		10	2.75882e+09	1.45533e+08	2.13767e+08	2.42408e+08	2.50915e+08	2.49322e+08	2.42798e+08	2.33998e+08	2.24282e+08	2.14339e+08	2.04513e+08	1.9497e+08	1.85788e+08	1.76993e+08	1.68592e+08	1.60578e+08	1.52938e+08	1.45659e+08	1.38725e+08	1.3212e+08	1.25829e+08	1.19838e+08	1.14131e+08	1.08696e+08	1.0352e+08	9.85909e+07	9.38961e+07	8.94249e+07	8.51666e+07	8.1111e+07	7.72486e+07	7.35701e+07	7.00667e+07	6.67302e+07	6.35526e+07	6.05263e+07	5.76441e+07	5.48991e+07	5.22849e+07	4.97951e+07	4.74239e+07	4.51657e+07	4.30149e+07	4.09666e+07	3.90158e+07	3.71579e+07	3.53885e+07
		11	2.84828e+09	1.48825e+08	2.18416e+08	2.47521e+08	2.56089e+08	2.54381e+08	2.47671e+08	2.38661e+08	2.2873e+08	2.18577e+08	2.0855e+08	1.98815e+08	1.89448e+08	1.80479e+08	1.71912e+08	1.63739e+08	1.55949e+08	1.48527e+08	1.41456e+08	1.34721e+08	1.28306e+08	1.22197e+08	1.16378e+08	1.10836e+08	1.05558e+08	1.00532e+08	9.57445e+07	9.11852e+07	8.68431e+07	8.27077e+07	7.87692e+07	7.50183e+07	7.1446e+07	6.80438e+07	6.48036e+07	6.17178e+07	5.87788e+07	5.59798e+07	5.33141e+07	5.07753e+07	4.83575e+07	4.60547e+07	4.38617e+07	4.1773e+07	3.97838e+07	3.78893e+07	3.60851e+07
		12	2.96756e+09	1.52125e+08	2.23072e+08	2.52639e+08	2.61265e+08	2.59442e+08	2.52545e+08	2.43324e+08	2.33178e+08	2.22816e+08	2.12586e+08	2.02659e+08	1.93109e+08	1.83965e+08	1.75232e+08	1.66901e+08	1.5896e+08	1.51394e+08	1.44187e+08	1.37322e+08	1.30783e+08	1.24556e+08	1.18625e+08	1.12976e+08	1.07596e+08	1.02472e+08	9.75928e+07	9.29456e+07	8.85196e+07	8.43044e+07	8.02899e+07	7.64665e+07	7.28253e+07	6.93574e+07	6.60547e+07	6.29092e+07	5.99135e+07	5.70605e+07	5.43433e+07	5.17556e+07	4.9291e+07	4.69438e+07	4.47084e+07	4.25794e+07	4.05518e+07	3.86208e+07	3.67817e+07
		13	3.13835e+09	1.55432e+08	2.27734e+08	2.5776e+08	2.66444e+08	2.64503e+08	2.57419e+08	2.47987e+08	2.37627e+08	2.27054e+08	2.16623e+08	2.06503e+08	1.9677e+08	1.87451e+08	1.78551e+08	1.70062e+08	1.61971e+08	1.54262e+08	1.46918e+08	1.39923e+08	1.3326e+08	1.26915e+08	1.20871e+08	1.15116e+08	1.09634e+08	1.04413e+08	9.94412e+07	9.47059e+07	9.01961e+07	8.5901e+07	8.18105e+07	7.79148e+07	7.42045e+07	7.0671e+07	6.73057e+07	6.41007e+07	6.10483e+07	5.81412e+07	5.53726e+07	5.27358e+07	5.02246e+07	4.78329e+07	4.55552e+07	4.33859e+07	4.13199e+07	3.93523e+07	3.74783e+07
		14	3.28654e+09	1.58746e+08	2.32402e+08	2.62886e+08	2.71625e+08	2.69566e+08	2.62293e+08	2.5265e+08	2.42075e+08	2.31293e+08	2.2066e+08	2.10347e+08	2.00431e+08	1.90937e+08	1.81871e+08	1.73224e+08	1.64982e+08	1.57129e+08	1.49649e+08	1.42523e+08	1.35737e+08	1.29274e+08	1.23118e+08	1.17255e+08	1.11672e+08	1.06354e+08	1.0129e+08	9.64662e+07	9.18726e+07	8.74977e+07	8.33312e+07	7.9363e+07	7.55838e+07	7.19846e+07	6.85567e+07	6.52921e+07	6.2183e+07	5.92219e+07	5.64018e+07	5.3716e+07	5.11581e+07	4.8722e+07	4.64019e+07	4.41923e+07	4.20879e+07	4.00837e+07	3.8175e+07
		15	3.36155e+09	1.62066e+08	2.37076e+08	2.68015e+08	2.76808e+08	2.74629e+08	2.67168e+08	2.57313e+08	2.46523e+08	2.35531e+08	2.24697e+08	2.14191e+08	2.04091e+08	1.94423e+08	1.85191e+08	1.76386e+08	1.67993e+08	1.59997e+08	1.5238e+08	1.45124e+08	1.38214e+08	1.31633e+08	1.25365e+08	1.19395e+08	1.13709e+08	1.08295e+08	1.03138e+08	9.82266e+07	9.35491e+07	8.90944e+07	8.48518e+07	8.08112e+07	7.69631e+07	7.32982e+07	6.98078e+07	6.64836e+07	6.33177e+07	6.03026e+07	5.7431e+07	5.46962e+07	5.20916e+07	4.96111e+07	4.72487e+07	4.49987e+07	4.28559e+07	4.08152e+07	3.88716e+07
		16	3.54047e+09	1.65393e+08	2.41756e+08	2.73148e+08	2.81992e+08	2.79694e+08	2.72044e+08	2.61976e+08	2.50972e+08	2.39769e+08	2.28733e+08	2.18036e+08	2.07752e+08	1.97909e+08	1.88511e+08	1.79547e+08	1.71004e+08	1.62864e+08	1.55111e+08	1.47725e+08	1.40691e+08	1.33992e+08	1.27611e+08	1.21535e+08	1.15747e+08	1.10236e+08	1.04986e+08	9.99869e+07	9.52256e+07	9.06911e+07	8.63724e+07	8.22595e+07	7.83423e+07	7.46118e+07	7.10588e+07	6.76751e+07	6.44524e+07	6.13833e+07	5.84603e+07	5.56764e+07	5.30252e+07	5.05002e+07	4.80954e+07	4.58051e+07	4.3624e+07	4.15466e+07	3.95682e+07
		17	3.73746e+09	1.68727e+08	2.46441e+08	2.78284e+08	2.87179e+08	2.84759e+08	2.76919e+08	2.6664e+08	2.5542e+08	2.44008e+08	2.3277e+08	2.2188e+08	2.11412e+08	2.01395e+08	1.9183e+08	1.82709e+08	1.74015e+08	1.65732e+08	1.57841e+08	1.50326e+08	1.43168e+08	1.36351e+08	1.29858e+08	1.23674e+08	1.17785e+08	1.12176e+08	1.06835e+08	1.01747e+08	9.69021e+07	9.22877e+07	8.78931e+07	8.37077e+07	7.97216e+07	7.59253e+07	7.23099e+07	6.88665e+07	6.55872e+07	6.2464e+07	5.94895e+07	5.66567e+07	5.39587e+07	5.13893e+07	4.89422e+07	4.66116e+07	4.4392e+07	4.22781e+07	4.02648e+07
		18	4.67544e+09	1.72067e+08	2.51132e+08	2.83424e+08	2.92368e+08	2.89826e+08	2.81795e+08	2.71303e+08	2.59868e+08	2.48246e+08	2.36807e+08	2.25724e+08	2.15073e+08	2.04881e+08	1.9515e+08	1.8587e+08	1.77026e+08	1.68599e+08	1.60572e+08	1.52927e+08	1.45645e+08	1.3871e+08	1.32105e+08	1.25814e+08	1.19823e+08	1.14117e+08	1.08683e+08	1.03508e+08	9.85786e+07	9.38844e+07	8.94137e+07	8.51559e+07	8.11009e+07	7.72389e+07	7.35609e+07	7.0058e+07	6.67219e+07	6.35447e+07	6.05187e+07	5.76369e+07	5.48923e+07	5.22784e+07	4.97889e+07	4.7418e+07	4.516e+07	4.30095e+07	4.09615e+07
		19	5.85379e+09	1.75413e+08	2.55828e+08	2.88567e+08	2.97558e+08	2.94893e+08	2.86672e+08	2.75967e+08	2.64316e+08	2.52484e+08	2.40843e+08	2.29568e+08	2.18734e+08	2.08367e+08	1.9847e+08	1.89032e+08	1.80037e+08	1.71467e+08	1.63303e+08	1.55528e+08	1.48122e+08	1.41069e+08	1.34351e+08	1.27954e+08	1.21861e+08	1.16058e+08	1.10531e+08	1.05268e+08	1.00255e+08	9.54811e+07	9.09344e+07	8.66042e+07	8.24801e+07	7.85525e+07	7.48119e+07	7.12495e+07	6.78566e+07	6.46254e+07	6.1548e+07	5.86171e+07	5.58258e+07	5.31674e+07	5.06357e+07	4.82244e+07	4.5928e+07	4.3741e+07	4.16581e+07
		20	7.63396e+09	1.78765e+08	2.60529e+08	2.93714e+08	3.02751e+08	2.99961e+08	2.91549e+08	2.80631e+08	2.68765e+08	2.56723e+08	2.4488e+08	2.33411e+08	2.22394e+08	2.11853e+08	2.0179e+08	1.92193e+08	1.83047e+08	1.74334e+08	1.66034e+08	1.58129e+08	1.50599e+08	1.43428e+08	1.36598e+08	1.30093e+08	1.23899e+08	1.17999e+08	1.1238e+08	1.07028e+08	1.01932e+08	9.70778e+07	9.2455e+07	8.80524e+07	8.38594e+07	7.98661e+07	7.6063e+07	7.24409e+07	6.89913e+07	6.5706e+07	6.25772e+07	5.95973e+07	5.67594e+07	5.40565e+07	5.14824e+07	4.90309e+07	4.66961e+07	4.44724e+07	4.23547e+07
	EBITDA diskontiert	Wholesale-only
		Cluster	NPV Capex	1	2	3	4	5	6	7	8	9	10	11	12	13	14	15	16	17	18	19	20	21	22	23	24	25	26	27	28	29	30	31	32	33	34	35	36	37	38	39	40	41	42	43	44	45	46
	NPV	1	1.58318e+09	1.0562e+08	1.56487e+08	1.78616e+08	1.85766e+08	1.85205e+08	1.8077e+08	1.74483e+08	1.67402e+08	1.6008e+08	1.52801e+08	1.45707e+08	1.38865e+08	1.32303e+08	1.2603e+08	1.20043e+08	1.14334e+08	1.08894e+08	1.0371e+08	9.8773e+07	9.40701e+07	8.95909e+07	8.53249e+07	8.12619e+07	7.73923e+07	7.3707e+07	7.01971e+07	6.68544e+07	6.36709e+07	6.06389e+07	5.77514e+07	5.50013e+07	5.23822e+07	4.98878e+07	4.75122e+07	4.52497e+07	4.3095e+07	4.10428e+07	3.90884e+07	3.7227e+07	3.54543e+07	3.3766e+07	3.21581e+07	3.06268e+07	2.91684e+07	2.77794e+07	2.64566e+07
		2	1.78017e+09	1.08546e+08	1.60652e+08	1.83224e+08	1.90446e+08	1.89791e+08	1.85194e+08	1.78718e+08	1.71444e+08	1.63932e+08	1.5647e+08	1.492e+08	1.42191e+08	1.35471e+08	1.29047e+08	1.22916e+08	1.1707e+08	1.11499e+08	1.06192e+08	1.01136e+08	9.63207e+07	9.17343e+07	8.73661e+07	8.32059e+07	7.92438e+07	7.54703e+07	7.18765e+07	6.84538e+07	6.51941e+07	6.20896e+07	5.9133e+07	5.63171e+07	5.36353e+07	5.10813e+07	4.86488e+07	4.63322e+07	4.41259e+07	4.20247e+07	4.00235e+07	3.81176e+07	3.63025e+07	3.45738e+07	3.29274e+07	3.13595e+07	2.98662e+07	2.8444e+07	2.70895e+07
		3	1.89042e+09	1.1148e+08	1.64825e+08	1.87836e+08	1.95128e+08	1.94379e+08	1.89618e+08	1.82953e+08	1.75485e+08	1.67783e+08	1.60138e+08	1.52694e+08	1.45518e+08	1.38639e+08	1.32063e+08	1.25788e+08	1.19806e+08	1.14105e+08	1.08673e+08	1.03499e+08	9.85712e+07	9.38776e+07	8.94074e+07	8.515e+07	8.10953e+07	7.72336e+07	7.35558e+07	7.00532e+07	6.67173e+07	6.35403e+07	6.05146e+07	5.76329e+07	5.48885e+07	5.22748e+07	4.97855e+07	4.74148e+07	4.51569e+07	4.30066e+07	4.09587e+07	3.90082e+07	3.71507e+07	3.53816e+07	3.36968e+07	3.20922e+07	3.0564e+07	2.91085e+07	2.77224e+07
		4	1.96452e+09	1.14422e+08	1.69005e+08	1.92453e+08	1.99813e+08	1.98968e+08	1.94042e+08	1.87188e+08	1.79527e+08	1.71635e+08	1.63806e+08	1.56187e+08	1.48844e+08	1.41806e+08	1.3508e+08	1.28661e+08	1.22541e+08	1.1671e+08	1.11154e+08	1.05862e+08	1.00822e+08	9.6021e+07	9.14487e+07	8.70941e+07	8.29468e+07	7.89969e+07	7.52352e+07	7.16526e+07	6.82405e+07	6.4991e+07	6.18962e+07	5.89488e+07	5.61417e+07	5.34683e+07	5.09222e+07	4.84973e+07	4.61879e+07	4.39885e+07	4.18938e+07	3.98988e+07	3.79989e+07	3.61894e+07	3.44661e+07	3.28249e+07	3.12618e+07	2.97731e+07	2.83554e+07
		5	2.05307e+09	1.17371e+08	1.73192e+08	1.97075e+08	2.04501e+08	2.03558e+08	1.98467e+08	1.91424e+08	1.83568e+08	1.75486e+08	1.67474e+08	1.5968e+08	1.5217e+08	1.44974e+08	1.38096e+08	1.31534e+08	1.25277e+08	1.19315e+08	1.13635e+08	1.08225e+08	1.03072e+08	9.81643e+07	9.349e+07	8.90381e+07	8.47983e+07	8.07603e+07	7.69146e+07	7.3252e+07	6.97638e+07	6.64417e+07	6.32778e+07	6.02646e+07	5.73948e+07	5.46617e+07	5.20588e+07	4.95798e+07	4.72189e+07	4.49704e+07	4.28289e+07	4.07894e+07	3.88471e+07	3.69972e+07	3.52354e+07	3.35576e+07	3.19596e+07	3.04377e+07	2.89883e+07
		6	2.17055e+09	1.20328e+08	1.77385e+08	2.017e+08	2.09191e+08	2.0815e+08	2.02892e+08	1.9566e+08	1.8761e+08	1.79337e+08	1.71143e+08	1.63173e+08	1.55497e+08	1.48141e+08	1.41112e+08	1.34406e+08	1.28013e+08	1.21921e+08	1.16117e+08	1.10588e+08	1.05323e+08	1.00308e+08	9.55312e+07	9.09822e+07	8.66498e+07	8.25236e+07	7.85939e+07	7.48513e+07	7.1287e+07	6.78924e+07	6.46594e+07	6.15804e+07	5.8648e+07	5.58552e+07	5.31955e+07	5.06623e+07	4.82499e+07	4.59522e+07	4.3764e+07	4.168e+07	3.96953e+07	3.7805e+07	3.60048e+07	3.42903e+07	3.26574e+07	3.11023e+07	2.96212e+07
		7	2.26633e+09	1.23292e+08	1.81585e+08	2.06331e+08	2.13883e+08	2.12742e+08	2.07318e+08	1.99896e+08	1.91651e+08	1.83189e+08	1.74811e+08	1.66666e+08	1.58823e+08	1.51309e+08	1.44129e+08	1.37279e+08	1.30748e+08	1.24526e+08	1.18598e+08	1.12951e+08	1.07573e+08	1.02451e+08	9.75725e+07	9.29263e+07	8.85012e+07	8.42869e+07	8.02733e+07	7.64507e+07	7.28102e+07	6.93431e+07	6.6041e+07	6.28962e+07	5.99012e+07	5.70487e+07	5.43321e+07	5.17449e+07	4.92808e+07	4.69341e+07	4.46992e+07	4.25706e+07	4.05435e+07	3.86128e+07	3.67741e+07	3.5023e+07	3.33552e+07	3.17669e+07	3.02542e+07
		8	2.457e+09	1.26264e+08	1.85791e+08	2.10965e+08	2.18578e+08	2.17336e+08	2.11745e+08	2.04132e+08	1.95693e+08	1.8704e+08	1.78479e+08	1.70159e+08	1.62149e+08	1.54476e+08	1.47145e+08	1.40151e+08	1.33484e+08	1.27131e+08	1.21079e+08	1.15314e+08	1.09824e+08	1.04594e+08	9.96138e+07	9.48703e+07	9.03527e+07	8.60502e+07	8.19526e+07	7.80501e+07	7.43335e+07	7.07938e+07	6.74226e+07	6.4212e+07	6.11543e+07	5.82422e+07	5.54688e+07	5.28274e+07	5.03118e+07	4.7916e+07	4.56343e+07	4.34612e+07	4.13917e+07	3.94206e+07	3.75434e+07	3.57557e+07	3.4053e+07	3.24314e+07	3.08871e+07
		9	2.56092e+09	1.29242e+08	1.90004e+08	2.15603e+08	2.23275e+08	2.21931e+08	2.16172e+08	2.08368e+08	1.99735e+08	1.90891e+08	1.82146e+08	1.73652e+08	1.65475e+08	1.57643e+08	1.50161e+08	1.43024e+08	1.3622e+08	1.29737e+08	1.2356e+08	1.17678e+08	1.12074e+08	1.06738e+08	1.01655e+08	9.68144e+07	9.22042e+07	8.78136e+07	8.3632e+07	7.96495e+07	7.58567e+07	7.22445e+07	6.88042e+07	6.55279e+07	6.24075e+07	5.94357e+07	5.66054e+07	5.39099e+07	5.13428e+07	4.88979e+07	4.65694e+07	4.43518e+07	4.22398e+07	4.02284e+07	3.83128e+07	3.64884e+07	3.47508e+07	3.3096e+07	3.152e+07
		10	2.75882e+09	1.32227e+08	1.94222e+08	2.20245e+08	2.27974e+08	2.26527e+08	2.20599e+08	2.12604e+08	2.03776e+08	1.94742e+08	1.85814e+08	1.77145e+08	1.68801e+08	1.60811e+08	1.53178e+08	1.45896e+08	1.38955e+08	1.32342e+08	1.26042e+08	1.20041e+08	1.14325e+08	1.08881e+08	1.03696e+08	9.87585e+07	9.40557e+07	8.95769e+07	8.53113e+07	8.12489e+07	7.73799e+07	7.36952e+07	7.01859e+07	6.68437e+07	6.36606e+07	6.06292e+07	5.77421e+07	5.49925e+07	5.23738e+07	4.98798e+07	4.75046e+07	4.52424e+07	4.3088e+07	4.10362e+07	3.90821e+07	3.72211e+07	3.54486e+07	3.37606e+07	3.2153e+07
		11	2.84828e+09	1.35219e+08	1.98447e+08	2.24891e+08	2.32675e+08	2.31123e+08	2.25027e+08	2.1684e+08	2.07818e+08	1.98593e+08	1.89482e+08	1.80637e+08	1.72127e+08	1.63978e+08	1.56194e+08	1.48769e+08	1.41691e+08	1.34947e+08	1.28523e+08	1.22404e+08	1.16575e+08	1.11024e+08	1.05738e+08	1.00703e+08	9.59072e+07	9.13402e+07	8.69907e+07	8.28483e+07	7.89031e+07	7.51458e+07	7.15675e+07	6.81595e+07	6.49138e+07	6.18227e+07	5.88787e+07	5.6075e+07	5.34047e+07	5.08617e+07	4.84397e+07	4.6133e+07	4.39362e+07	4.1844e+07	3.98514e+07	3.79538e+07	3.61464e+07	3.44252e+07	3.27859e+07
		12	2.96756e+09	1.38217e+08	2.02677e+08	2.29541e+08	2.37378e+08	2.35721e+08	2.29455e+08	2.21077e+08	2.11859e+08	2.02444e+08	1.9315e+08	1.8413e+08	1.75453e+08	1.67146e+08	1.5921e+08	1.51641e+08	1.44427e+08	1.37553e+08	1.31004e+08	1.24767e+08	1.18826e+08	1.13168e+08	1.07779e+08	1.02647e+08	9.77587e+07	9.31036e+07	8.86701e+07	8.44477e+07	8.04264e+07	7.65965e+07	7.29491e+07	6.94753e+07	6.6167e+07	6.30162e+07	6.00154e+07	5.71575e+07	5.44357e+07	5.18436e+07	4.93748e+07	4.70236e+07	4.47844e+07	4.26518e+07	4.06208e+07	3.86865e+07	3.68442e+07	3.50898e+07	3.34188e+07
		13	3.13835e+09	1.41221e+08	2.06913e+08	2.34194e+08	2.42083e+08	2.4032e+08	2.33883e+08	2.25313e+08	2.15901e+08	2.06295e+08	1.96818e+08	1.87623e+08	1.78779e+08	1.70313e+08	1.62227e+08	1.54514e+08	1.47162e+08	1.40158e+08	1.33485e+08	1.2713e+08	1.21076e+08	1.15311e+08	1.0982e+08	1.04591e+08	9.96102e+07	9.48669e+07	9.03494e+07	8.60471e+07	8.19496e+07	7.80472e+07	7.43307e+07	7.07911e+07	6.74201e+07	6.42096e+07	6.1152e+07	5.824e+07	5.54667e+07	5.28254e+07	5.03099e+07	4.79142e+07	4.56326e+07	4.34596e+07	4.13901e+07	3.94192e+07	3.75421e+07	3.57543e+07	3.40517e+07
		14	3.28654e+09	1.44232e+08	2.11154e+08	2.3885e+08	2.46791e+08	2.4492e+08	2.38312e+08	2.2955e+08	2.19942e+08	2.10146e+08	2.00485e+08	1.91116e+08	1.82105e+08	1.7348e+08	1.65243e+08	1.57386e+08	1.49898e+08	1.42763e+08	1.35967e+08	1.29493e+08	1.23327e+08	1.17454e+08	1.11861e+08	1.06535e+08	1.01462e+08	9.66302e+07	9.20288e+07	8.76465e+07	8.34728e+07	7.94979e+07	7.57123e+07	7.2107e+07	6.86733e+07	6.54031e+07	6.22887e+07	5.93226e+07	5.64977e+07	5.38073e+07	5.12451e+07	4.88048e+07	4.64808e+07	4.42674e+07	4.21594e+07	4.01519e+07	3.82399e+07	3.64189e+07	3.46847e+07
		15	3.36155e+09	1.47249e+08	2.15401e+08	2.43511e+08	2.51499e+08	2.4952e+08	2.42741e+08	2.33787e+08	2.23984e+08	2.13997e+08	2.04153e+08	1.94608e+08	1.85431e+08	1.76647e+08	1.68259e+08	1.60259e+08	1.52634e+08	1.45368e+08	1.38448e+08	1.31856e+08	1.25577e+08	1.19598e+08	1.13903e+08	1.08479e+08	1.03313e+08	9.83935e+07	9.37081e+07	8.92458e+07	8.4996e+07	8.09486e+07	7.70939e+07	7.34228e+07	6.99265e+07	6.65966e+07	6.34254e+07	6.04051e+07	5.75287e+07	5.47892e+07	5.21802e+07	4.96954e+07	4.7329e+07	4.50752e+07	4.29288e+07	4.08846e+07	3.89377e+07	3.70835e+07	3.53176e+07
		16	3.54047e+09	1.50272e+08	2.19652e+08	2.48174e+08	2.5621e+08	2.54122e+08	2.47171e+08	2.38024e+08	2.28026e+08	2.17848e+08	2.07821e+08	1.98101e+08	1.88757e+08	1.79815e+08	1.71275e+08	1.63131e+08	1.55369e+08	1.47974e+08	1.40929e+08	1.34219e+08	1.27828e+08	1.21741e+08	1.15944e+08	1.10423e+08	1.05165e+08	1.00157e+08	9.53875e+07	9.08452e+07	8.65193e+07	8.23993e+07	7.84755e+07	7.47386e+07	7.11796e+07	6.77901e+07	6.4562e+07	6.14876e+07	5.85596e+07	5.57711e+07	5.31153e+07	5.0586e+07	4.81772e+07	4.5883e+07	4.36981e+07	4.16172e+07	3.96355e+07	3.77481e+07	3.59505e+07
		17	3.73746e+09	1.533e+08	2.23909e+08	2.52841e+08	2.60923e+08	2.58724e+08	2.51601e+08	2.42261e+08	2.32067e+08	2.21699e+08	2.11488e+08	2.01593e+08	1.92083e+08	1.82982e+08	1.74292e+08	1.66004e+08	1.58105e+08	1.50579e+08	1.4341e+08	1.36582e+08	1.30078e+08	1.23884e+08	1.17985e+08	1.12367e+08	1.07016e+08	1.0192e+08	9.70668e+07	9.24446e+07	8.80425e+07	8.385e+07	7.98571e+07	7.60544e+07	7.24328e+07	6.89836e+07	6.56987e+07	6.25702e+07	5.95906e+07	5.6753e+07	5.40505e+07	5.14766e+07	4.90254e+07	4.66908e+07	4.44674e+07	4.23499e+07	4.03333e+07	3.84127e+07	3.65835e+07
		18	4.67544e+09	1.56335e+08	2.28171e+08	2.57511e+08	2.65637e+08	2.63327e+08	2.56031e+08	2.46498e+08	2.36109e+08	2.25549e+08	2.15156e+08	2.05086e+08	1.95409e+08	1.86149e+08	1.77308e+08	1.68876e+08	1.6084e+08	1.53184e+08	1.45891e+08	1.38945e+08	1.32329e+08	1.26028e+08	1.20027e+08	1.14311e+08	1.08868e+08	1.03684e+08	9.87462e+07	9.4044e+07	8.95657e+07	8.53007e+07	8.12388e+07	7.73702e+07	7.36859e+07	7.01771e+07	6.68353e+07	6.36527e+07	6.06216e+07	5.77349e+07	5.49856e+07	5.23672e+07	4.98735e+07	4.74986e+07	4.52368e+07	4.30826e+07	4.10311e+07	3.90772e+07	3.72164e+07
		19	5.85379e+09	1.59375e+08	2.32438e+08	2.62184e+08	2.70353e+08	2.67931e+08	2.60462e+08	2.50736e+08	2.4015e+08	2.294e+08	2.18823e+08	2.08579e+08	1.98735e+08	1.89316e+08	1.80324e+08	1.71749e+08	1.63576e+08	1.5579e+08	1.48373e+08	1.41308e+08	1.34579e+08	1.28171e+08	1.22068e+08	1.16255e+08	1.10719e+08	1.05447e+08	1.00426e+08	9.56434e+07	9.10889e+07	8.67514e+07	8.26204e+07	7.86861e+07	7.49391e+07	7.13706e+07	6.7972e+07	6.47352e+07	6.16526e+07	5.87167e+07	5.59207e+07	5.32578e+07	5.07217e+07	4.83064e+07	4.60061e+07	4.38153e+07	4.17289e+07	3.97418e+07	3.78493e+07
		20	7.63396e+09	1.62421e+08	2.36709e+08	2.6686e+08	2.75071e+08	2.72536e+08	2.64893e+08	2.54973e+08	2.44192e+08	2.33251e+08	2.22491e+08	2.12071e+08	2.02061e+08	1.92484e+08	1.8334e+08	1.74621e+08	1.66312e+08	1.58395e+08	1.50854e+08	1.43671e+08	1.3683e+08	1.30314e+08	1.24109e+08	1.18199e+08	1.12571e+08	1.0721e+08	1.02105e+08	9.72428e+07	9.26122e+07	8.82021e+07	8.4002e+07	8.00019e+07	7.61923e+07	7.25641e+07	6.91086e+07	6.58177e+07	6.26836e+07	5.96986e+07	5.68558e+07	5.41484e+07	5.15699e+07	4.91142e+07	4.67754e+07	4.4548e+07	4.24267e+07	4.04064e+07	3.84823e+07
	NPV	Integriert
		Cluster	NPV Capex	1	2	3	4	5	6	7	8	9	10	11	12	13	14	15	16	17	18	19	20	21	22	23	24	25	26	27	28	29	30	31	32	33	34	35	36	37	38	39	40	41	42	43	44	45	46
	NPV	1	1.58318e+09	-1.46693e+09	-1.2947e+09	-1.09811e+09	-8.93647e+08	-6.89805e+08	-4.90844e+08	-2.98803e+08	-1.14556e+08	6.16333e+07	2.29811e+08	3.90181e+08	5.43019e+08	6.88636e+08	8.27349e+08	9.59472e+08	1.08531e+09	1.20516e+09	1.31931e+09	1.42802e+09	1.53156e+09	1.63016e+09	1.72408e+09	1.81352e+09	1.8987e+09	1.97982e+09	2.05708e+09	2.13066e+09	2.20074e+09	2.26748e+09	2.33104e+09	2.39158e+09	2.44923e+09	2.50414e+09	2.55643e+09	2.60624e+09	2.65367e+09	2.69884e+09	2.74186e+09	2.78284e+09	2.82186e+09	2.85902e+09	2.89442e+09	2.92813e+09	2.96023e+09	2.9908e+09	3.01992e+09
		2	1.78017e+09	-1.6607e+09	-1.48389e+09	-1.28222e+09	-1.07261e+09	-8.63724e+08	-6.59895e+08	-4.63193e+08	-2.74497e+08	-9.40687e+07	7.81464e+07	2.42361e+08	3.98861e+08	5.47964e+08	6.89997e+08	8.25281e+08	9.54132e+08	1.07685e+09	1.19373e+09	1.30504e+09	1.41106e+09	1.51202e+09	1.60818e+09	1.69976e+09	1.78698e+09	1.87004e+09	1.94915e+09	2.02449e+09	2.09625e+09	2.16458e+09	2.22967e+09	2.29165e+09	2.35068e+09	2.40691e+09	2.46045e+09	2.51144e+09	2.56001e+09	2.60626e+09	2.65032e+09	2.69227e+09	2.73222e+09	2.77028e+09	2.80652e+09	2.84103e+09	2.87391e+09	2.90521e+09	2.93503e+09
		3	1.89042e+09	-1.76772e+09	-1.58631e+09	-1.37957e+09	-1.16481e+09	-9.50867e+08	-7.42168e+08	-5.40805e+08	-3.47661e+08	-1.62994e+08	1.32587e+07	1.81318e+08	3.41479e+08	4.94069e+08	6.39421e+08	7.77867e+08	9.09729e+08	1.03532e+09	1.15492e+09	1.26884e+09	1.37733e+09	1.48065e+09	1.57906e+09	1.67278e+09	1.76203e+09	1.84704e+09	1.928e+09	2.0051e+09	2.07853e+09	2.14846e+09	2.21507e+09	2.2785e+09	2.33891e+09	2.39645e+09	2.45124e+09	2.50343e+09	2.55313e+09	2.60046e+09	2.64554e+09	2.68848e+09	2.72937e+09	2.76831e+09	2.8054e+09	2.84072e+09	2.87436e+09	2.9064e+09	2.93691e+09
		4	1.96452e+09	-1.83858e+09	-1.65257e+09	-1.44075e+09	-1.22083e+09	-1.00184e+09	-7.8827e+08	-5.82245e+08	-3.84653e+08	-1.95747e+08	-1.54569e+07	1.56447e+08	3.20269e+08	4.76345e+08	6.25018e+08	7.66625e+08	9.01498e+08	1.02995e+09	1.15229e+09	1.26881e+09	1.37977e+09	1.48546e+09	1.58611e+09	1.68197e+09	1.77326e+09	1.86021e+09	1.94301e+09	2.02188e+09	2.09698e+09	2.16851e+09	2.23664e+09	2.30152e+09	2.36331e+09	2.42216e+09	2.47821e+09	2.53158e+09	2.58242e+09	2.63083e+09	2.67694e+09	2.72086e+09	2.76268e+09	2.80251e+09	2.84045e+09	2.87657e+09	2.91098e+09	2.94375e+09	2.97496e+09
		5	2.05307e+09	-1.92389e+09	-1.73327e+09	-1.51636e+09	-1.29129e+09	-1.06724e+09	-8.48804e+08	-6.38118e+08	-4.36077e+08	-2.42932e+08	-5.8605e+07	1.17143e+08	2.84627e+08	4.44189e+08	5.96181e+08	7.40951e+08	8.78834e+08	1.01016e+09	1.13523e+09	1.25434e+09	1.36779e+09	1.47583e+09	1.57873e+09	1.67673e+09	1.77006e+09	1.85894e+09	1.9436e+09	2.02422e+09	2.10101e+09	2.17413e+09	2.24378e+09	2.31011e+09	2.37328e+09	2.43344e+09	2.49074e+09	2.54531e+09	2.59728e+09	2.64677e+09	2.69391e+09	2.73881e+09	2.78156e+09	2.82228e+09	2.86106e+09	2.898e+09	2.93317e+09	2.96667e+09	2.99858e+09
		6	2.17055e+09	-2.03811e+09	-1.84287e+09	-1.62088e+09	-1.39064e+09	-1.16154e+09	-9.3823e+08	-7.22882e+08	-5.16393e+08	-3.19009e+08	-1.30645e+08	4.89482e+07	2.20092e+08	3.83141e+08	5.38453e+08	6.86385e+08	8.27279e+08	9.61468e+08	1.08927e+09	1.21099e+09	1.32691e+09	1.43731e+09	1.54245e+09	1.64259e+09	1.73796e+09	1.82879e+09	1.91529e+09	1.99767e+09	2.07614e+09	2.15086e+09	2.22203e+09	2.2898e+09	2.35435e+09	2.41583e+09	2.47438e+09	2.53014e+09	2.58324e+09	2.63382e+09	2.68199e+09	2.72786e+09	2.77155e+09	2.81316e+09	2.85279e+09	2.89053e+09	2.92647e+09	2.9607e+09	2.99331e+09
		7	2.26633e+09	-2.13063e+09	-1.93078e+09	-1.70368e+09	-1.46828e+09	-1.23413e+09	-1.00594e+09	-7.85934e+08	-5.74997e+08	-3.73374e+08	-1.80973e+08	2.46475e+06	1.7727e+08	3.43805e+08	5.02437e+08	6.5353e+08	7.97435e+08	9.34492e+08	1.06502e+09	1.18934e+09	1.30774e+09	1.4205e+09	1.52789e+09	1.63017e+09	1.72758e+09	1.82034e+09	1.9087e+09	1.99284e+09	2.07298e+09	2.1493e+09	2.22198e+09	2.29121e+09	2.35714e+09	2.41993e+09	2.47973e+09	2.53668e+09	2.59092e+09	2.64258e+09	2.69177e+09	2.73863e+09	2.78325e+09	2.82575e+09	2.86622e+09	2.90477e+09	2.94148e+09	2.97645e+09	3.00975e+09
		8	2.457e+09	-2.31803e+09	-2.11354e+09	-1.88135e+09	-1.64078e+09	-1.40157e+09	-1.16852e+09	-9.43845e+08	-7.28459e+08	-5.22598e+08	-3.26159e+08	-1.38877e+08	3.95886e+07	2.09609e+08	3.71562e+08	5.25816e+08	6.72733e+08	8.12657e+08	9.4592e+08	1.07284e+09	1.19371e+09	1.30883e+09	1.41847e+09	1.52289e+09	1.62233e+09	1.71704e+09	1.80724e+09	1.89315e+09	1.97496e+09	2.05288e+09	2.12708e+09	2.19776e+09	2.26507e+09	2.32917e+09	2.39022e+09	2.44836e+09	2.50374e+09	2.55648e+09	2.6067e+09	2.65454e+09	2.70009e+09	2.74348e+09	2.7848e+09	2.82416e+09	2.86164e+09	2.89733e+09	2.93133e+09
		9	2.56092e+09	-2.41867e+09	-2.20955e+09	-1.97225e+09	-1.72651e+09	-1.48224e+09	-1.24432e+09	-1.01498e+09	-7.95149e+08	-5.85049e+08	-3.84573e+08	-1.93447e+08	-1.13202e+07	1.62187e+08	3.27459e+08	4.84875e+08	6.34802e+08	7.77594e+08	9.13588e+08	1.04311e+09	1.16646e+09	1.28394e+09	1.39582e+09	1.50238e+09	1.60386e+09	1.70051e+09	1.79256e+09	1.88022e+09	1.96371e+09	2.04323e+09	2.11896e+09	2.19108e+09	2.25977e+09	2.32518e+09	2.38748e+09	2.44682e+09	2.50333e+09	2.55715e+09	2.6084e+09	2.65722e+09	2.70371e+09	2.74798e+09	2.79015e+09	2.83031e+09	2.86856e+09	2.90499e+09	2.93968e+09
		10	2.75882e+09	-2.61328e+09	-2.39952e+09	-2.15711e+09	-1.90619e+09	-1.65687e+09	-1.41407e+09	-1.18008e+09	-9.55795e+08	-7.41456e+08	-5.36944e+08	-3.41973e+08	-1.56185e+08	2.08077e+07	1.894e+08	3.49977e+08	5.02916e+08	6.48575e+08	7.873e+08	9.1942e+08	1.04525e+09	1.16509e+09	1.27922e+09	1.38791e+09	1.49144e+09	1.59003e+09	1.68392e+09	1.77335e+09	1.85851e+09	1.93962e+09	2.01687e+09	2.09044e+09	2.16051e+09	2.22724e+09	2.29079e+09	2.35132e+09	2.40896e+09	2.46386e+09	2.51615e+09	2.56594e+09	2.61337e+09	2.65853e+09	2.70155e+09	2.74251e+09	2.78153e+09	2.81869e+09	2.85408e+09
		11	2.84828e+09	-2.69945e+09	-2.48104e+09	-2.23351e+09	-1.97742e+09	-1.72304e+09	-1.47537e+09	-1.23671e+09	-1.00798e+09	-7.89404e+08	-5.80855e+08	-3.8204e+08	-1.92592e+08	-1.21126e+07	1.59799e+08	3.23538e+08	4.79488e+08	6.28014e+08	7.6947e+08	9.04191e+08	1.0325e+09	1.15469e+09	1.27107e+09	1.38191e+09	1.48747e+09	1.588e+09	1.68374e+09	1.77493e+09	1.86177e+09	1.94448e+09	2.02325e+09	2.09827e+09	2.16971e+09	2.23776e+09	2.30256e+09	2.36428e+09	2.42306e+09	2.47904e+09	2.53235e+09	2.58313e+09	2.63148e+09	2.67754e+09	2.7214e+09	2.76317e+09	2.80296e+09	2.84085e+09	2.87693e+09
		12	2.96756e+09	-2.81543e+09	-2.59236e+09	-2.33972e+09	-2.07846e+09	-1.81901e+09	-1.56647e+09	-1.32315e+09	-1.08997e+09	-8.67152e+08	-6.54565e+08	-4.51906e+08	-2.58797e+08	-7.48319e+07	1.004e+08	2.67301e+08	4.26261e+08	5.77655e+08	7.21842e+08	8.59164e+08	9.89947e+08	1.1145e+09	1.23313e+09	1.3461e+09	1.4537e+09	1.55617e+09	1.65376e+09	1.74671e+09	1.83523e+09	1.91953e+09	1.99982e+09	2.07629e+09	2.14912e+09	2.21847e+09	2.28453e+09	2.34744e+09	2.40735e+09	2.46441e+09	2.51875e+09	2.57051e+09	2.6198e+09	2.66674e+09	2.71145e+09	2.75403e+09	2.79458e+09	2.83321e+09	2.86999e+09
		13	3.13835e+09	-2.98291e+09	-2.75518e+09	-2.49742e+09	-2.23097e+09	-1.96647e+09	-1.70905e+09	-1.46107e+09	-1.22344e+09	-9.96385e+08	-7.79762e+08	-5.73259e+08	-3.76489e+08	-1.89038e+08	-1.04866e+07	1.59576e+08	3.21547e+08	4.75809e+08	6.22727e+08	7.62649e+08	8.95909e+08	1.02282e+09	1.1437e+09	1.25881e+09	1.36844e+09	1.47286e+09	1.5723e+09	1.667e+09	1.7572e+09	1.8431e+09	1.92491e+09	2.00283e+09	2.07703e+09	2.1477e+09	2.21501e+09	2.27911e+09	2.34016e+09	2.3983e+09	2.45367e+09	2.50641e+09	2.55663e+09	2.60446e+09	2.65002e+09	2.69341e+09	2.73473e+09	2.77408e+09	2.81156e+09
		14	3.28654e+09	-3.1278e+09	-2.89539e+09	-2.63251e+09	-2.36088e+09	-2.09132e+09	-1.82903e+09	-1.57638e+09	-1.3343e+09	-1.10301e+09	-8.82348e+08	-6.72001e+08	-4.7157e+08	-2.80633e+08	-9.87617e+07	7.44623e+07	2.39444e+08	3.96574e+08	5.46222e+08	6.88746e+08	8.24483e+08	9.53757e+08	1.07687e+09	1.19413e+09	1.3058e+09	1.41216e+09	1.51345e+09	1.60991e+09	1.70178e+09	1.78928e+09	1.87261e+09	1.95198e+09	2.02756e+09	2.09954e+09	2.1681e+09	2.23339e+09	2.29558e+09	2.3548e+09	2.4112e+09	2.46492e+09	2.51607e+09	2.5648e+09	2.6112e+09	2.65539e+09	2.69748e+09	2.73756e+09	2.77574e+09
		15	3.36155e+09	-3.19948e+09	-2.9624e+09	-2.69439e+09	-2.41758e+09	-2.14295e+09	-1.87578e+09	-1.61847e+09	-1.37195e+09	-1.13642e+09	-9.11719e+08	-6.97527e+08	-4.93436e+08	-2.99013e+08	-1.13822e+08	6.25635e+07	2.30556e+08	3.90553e+08	5.42933e+08	6.88057e+08	8.26271e+08	9.57904e+08	1.08327e+09	1.20266e+09	1.31637e+09	1.42467e+09	1.52781e+09	1.62603e+09	1.71958e+09	1.80868e+09	1.89353e+09	1.97434e+09	2.0513e+09	2.1246e+09	2.19441e+09	2.26089e+09	2.32421e+09	2.38451e+09	2.44194e+09	2.49664e+09	2.54873e+09	2.59834e+09	2.64559e+09	2.69059e+09	2.73344e+09	2.77426e+09	2.81313e+09
		16	3.54047e+09	-3.37507e+09	-3.13332e+09	-2.86017e+09	-2.57818e+09	-2.29848e+09	-2.02644e+09	-1.76446e+09	-1.51349e+09	-1.27372e+09	-1.04499e+09	-8.26954e+08	-6.19202e+08	-4.21293e+08	-2.32782e+08	-5.32348e+07	1.17769e+08	2.80633e+08	4.35744e+08	5.83469e+08	7.2416e+08	8.58152e+08	9.85763e+08	1.1073e+09	1.22305e+09	1.33328e+09	1.43827e+09	1.53825e+09	1.63348e+09	1.72417e+09	1.81054e+09	1.8928e+09	1.97114e+09	2.04576e+09	2.11682e+09	2.18449e+09	2.24894e+09	2.31033e+09	2.36879e+09	2.42446e+09	2.47749e+09	2.52799e+09	2.57608e+09	2.62189e+09	2.66551e+09	2.70706e+09	2.74663e+09
		17	3.73746e+09	-3.56873e+09	-3.32229e+09	-3.04401e+09	-2.75683e+09	-2.47207e+09	-2.19515e+09	-1.92851e+09	-1.67309e+09	-1.42908e+09	-1.19631e+09	-9.74434e+08	-7.63021e+08	-5.61626e+08	-3.69796e+08	-1.87087e+08	-1.30723e+07	1.52659e+08	3.10501e+08	4.60827e+08	6.03995e+08	7.40346e+08	8.70204e+08	9.93878e+08	1.11166e+09	1.22384e+09	1.33067e+09	1.43242e+09	1.52932e+09	1.62161e+09	1.7095e+09	1.79321e+09	1.87293e+09	1.94886e+09	2.02117e+09	2.09004e+09	2.15562e+09	2.21809e+09	2.27758e+09	2.33423e+09	2.38819e+09	2.43958e+09	2.48852e+09	2.53513e+09	2.57953e+09	2.6218e+09	2.66207e+09
		18	4.67544e+09	-4.50337e+09	-4.25224e+09	-3.96882e+09	-3.67645e+09	-3.38662e+09	-3.10483e+09	-2.83353e+09	-2.57366e+09	-2.32541e+09	-2.0886e+09	-1.86288e+09	-1.64781e+09	-1.44293e+09	-1.24778e+09	-1.06191e+09	-8.84881e+08	-7.16282e+08	-5.5571e+08	-4.02783e+08	-2.57138e+08	-1.18428e+08	1.36768e+07	1.39491e+08	2.59314e+08	3.73431e+08	4.82114e+08	5.85621e+08	6.842e+08	7.78084e+08	8.67498e+08	9.52654e+08	1.03375e+09	1.11099e+09	1.18455e+09	1.25461e+09	1.32133e+09	1.38488e+09	1.4454e+09	1.50303e+09	1.55793e+09	1.61021e+09	1.65999e+09	1.70741e+09	1.75257e+09	1.79558e+09	1.83654e+09
		19	5.85379e+09	-5.67837e+09	-5.42255e+09	-5.13398e+09	-4.83642e+09	-4.54153e+09	-4.25486e+09	-3.97889e+09	-3.71457e+09	-3.46209e+09	-3.22125e+09	-2.99168e+09	-2.77295e+09	-2.56458e+09	-2.36611e+09	-2.17708e+09	-1.99704e+09	-1.82557e+09	-1.66227e+09	-1.50674e+09	-1.35862e+09	-1.21755e+09	-1.0832e+09	-9.55247e+08	-8.33386e+08	-7.17328e+08	-6.06797e+08	-5.01529e+08	-4.01274e+08	-3.05793e+08	-2.14859e+08	-1.28254e+08	-4.57742e+07	3.27783e+07	1.0759e+08	1.7884e+08	2.46696e+08	3.11322e+08	3.7287e+08	4.31487e+08	4.87313e+08	5.4048e+08	5.91116e+08	6.3934e+08	6.85268e+08	7.29009e+08	7.70667e+08
		20	7.63396e+09	-7.4552e+09	-7.19467e+09	-6.90095e+09	-6.5982e+09	-6.29824e+09	-6.00669e+09	-5.72606e+09	-5.4573e+09	-5.20058e+09	-4.9557e+09	-4.72228e+09	-4.49989e+09	-4.28804e+09	-4.08625e+09	-3.89405e+09	-3.71101e+09	-3.53667e+09	-3.37064e+09	-3.21251e+09	-3.06191e+09	-2.91848e+09	-2.78189e+09	-2.65179e+09	-2.52789e+09	-2.40989e+09	-2.29752e+09	-2.19049e+09	-2.08856e+09	-1.99148e+09	-1.89902e+09	-1.81097e+09	-1.72711e+09	-1.64724e+09	-1.57118e+09	-1.49874e+09	-1.42975e+09	-1.36404e+09	-1.30147e+09	-1.24187e+09	-1.18511e+09	-1.13105e+09	-1.07957e+09	-1.03054e+09	-9.83844e+08	-9.39371e+08	-8.97016e+08
	NPV	wholesale-only
		Cluster	NPV Capex	1	2	3	4	5	6	7	8	9	10	11	12	13	14	15	16	17	18	19	20	21	22	23	24	25	26	27	28	29	30	31	32	33	34	35	36	37	38	39	40	41	42	43	44	45	46
	NPV	1	1.58318e+09	-1.47756e+09	-1.32107e+09	-1.14246e+09	-9.5669e+08	-7.71485e+08	-5.90715e+08	-4.16232e+08	-2.4883e+08	-8.87495e+07	6.40519e+07	2.09759e+08	3.48624e+08	4.80928e+08	6.06958e+08	7.27001e+08	8.41335e+08	9.50229e+08	1.05394e+09	1.15271e+09	1.24678e+09	1.33637e+09	1.4217e+09	1.50296e+09	1.58035e+09	1.65406e+09	1.72426e+09	1.79111e+09	1.85478e+09	1.91542e+09	1.97317e+09	2.02817e+09	2.08056e+09	2.13044e+09	2.17796e+09	2.22321e+09	2.2663e+09	2.30734e+09	2.34643e+09	2.38366e+09	2.41911e+09	2.45288e+09	2.48504e+09	2.51566e+09	2.54483e+09	2.57261e+09	2.59907e+09
		2	1.78017e+09	-1.67163e+09	-1.51097e+09	-1.32775e+09	-1.13731e+09	-9.47514e+08	-7.6232e+08	-5.83602e+08	-4.12159e+08	-2.48227e+08	-9.17571e+07	5.74434e+07	1.99635e+08	3.35106e+08	4.64153e+08	5.87068e+08	7.04138e+08	8.15637e+08	9.21829e+08	1.02297e+09	1.11929e+09	1.21102e+09	1.29839e+09	1.38159e+09	1.46084e+09	1.53631e+09	1.60818e+09	1.67664e+09	1.74183e+09	1.80392e+09	1.86305e+09	1.91937e+09	1.97301e+09	2.02409e+09	2.07274e+09	2.11907e+09	2.16319e+09	2.20522e+09	2.24524e+09	2.28336e+09	2.31966e+09	2.35424e+09	2.38716e+09	2.41852e+09	2.44839e+09	2.47683e+09	2.50392e+09
		3	1.89042e+09	-1.77894e+09	-1.61411e+09	-1.42628e+09	-1.23115e+09	-1.03677e+09	-8.47151e+08	-6.64198e+08	-4.88713e+08	-3.2093e+08	-1.60792e+08	-8.098e+06	1.3742e+08	2.76058e+08	4.08122e+08	5.3391e+08	6.53716e+08	7.6782e+08	8.76493e+08	9.79992e+08	1.07856e+09	1.17244e+09	1.26185e+09	1.347e+09	1.42809e+09	1.50533e+09	1.57888e+09	1.64894e+09	1.71565e+09	1.77919e+09	1.83971e+09	1.89734e+09	1.95223e+09	2.0045e+09	2.05429e+09	2.10171e+09	2.14686e+09	2.18987e+09	2.23083e+09	2.26984e+09	2.30699e+09	2.34237e+09	2.37606e+09	2.40816e+09	2.43872e+09	2.46783e+09	2.49555e+09
		4	1.96452e+09	-1.85009e+09	-1.68109e+09	-1.48864e+09	-1.28882e+09	-1.08985e+09	-8.95813e+08	-7.08624e+08	-5.29098e+08	-3.57463e+08	-1.93657e+08	-3.74697e+07	1.11374e+08	2.53181e+08	3.8826e+08	5.16921e+08	6.39463e+08	7.56172e+08	8.67327e+08	9.73189e+08	1.07401e+09	1.17003e+09	1.26148e+09	1.34857e+09	1.43152e+09	1.51052e+09	1.58575e+09	1.65741e+09	1.72565e+09	1.79064e+09	1.85253e+09	1.91148e+09	1.96762e+09	2.02109e+09	2.07201e+09	2.12051e+09	2.1667e+09	2.21069e+09	2.25258e+09	2.29248e+09	2.33048e+09	2.36667e+09	2.40114e+09	2.43396e+09	2.46522e+09	2.49499e+09	2.52335e+09
		5	2.05307e+09	-1.9357e+09	-1.76251e+09	-1.56544e+09	-1.36093e+09	-1.15738e+09	-9.58909e+08	-7.67485e+08	-5.83917e+08	-4.08431e+08	-2.40956e+08	-8.12764e+07	7.08941e+07	2.15868e+08	3.53964e+08	4.85497e+08	6.10774e+08	7.3009e+08	8.43725e+08	9.5195e+08	1.05502e+09	1.15319e+09	1.24668e+09	1.33571e+09	1.42051e+09	1.50127e+09	1.57819e+09	1.65144e+09	1.7212e+09	1.78765e+09	1.85092e+09	1.91119e+09	1.96858e+09	2.02324e+09	2.0753e+09	2.12488e+09	2.1721e+09	2.21707e+09	2.2599e+09	2.30069e+09	2.33954e+09	2.37653e+09	2.41177e+09	2.44533e+09	2.47729e+09	2.50773e+09	2.53671e+09
		6	2.17055e+09	-2.05022e+09	-1.87283e+09	-1.67113e+09	-1.46194e+09	-1.25379e+09	-1.0509e+09	-8.5524e+08	-6.6763e+08	-4.88292e+08	-3.1715e+08	-1.53977e+08	1.51976e+06	1.49661e+08	2.90773e+08	4.25179e+08	5.53192e+08	6.75113e+08	7.91229e+08	9.01818e+08	1.00714e+09	1.10745e+09	1.20298e+09	1.29396e+09	1.38061e+09	1.46314e+09	1.54173e+09	1.61658e+09	1.68787e+09	1.75576e+09	1.82042e+09	1.882e+09	1.94065e+09	1.9965e+09	2.0497e+09	2.10036e+09	2.14861e+09	2.19456e+09	2.23833e+09	2.28001e+09	2.3197e+09	2.35751e+09	2.39351e+09	2.4278e+09	2.46046e+09	2.49156e+09	2.52118e+09
		7	2.26633e+09	-2.14304e+09	-1.96145e+09	-1.75512e+09	-1.54124e+09	-1.3285e+09	-1.12118e+09	-9.21285e+08	-7.29633e+08	-5.46445e+08	-3.71634e+08	-2.04968e+08	-4.61452e+07	1.05163e+08	2.49292e+08	3.86571e+08	5.17319e+08	6.41845e+08	7.60443e+08	8.73395e+08	9.80968e+08	1.08342e+09	1.18099e+09	1.27392e+09	1.36242e+09	1.44671e+09	1.52698e+09	1.60343e+09	1.67624e+09	1.74558e+09	1.81162e+09	1.87452e+09	1.93442e+09	1.99147e+09	2.0458e+09	2.09755e+09	2.14683e+09	2.19376e+09	2.23846e+09	2.28103e+09	2.32158e+09	2.36019e+09	2.39696e+09	2.43199e+09	2.46534e+09	2.49711e+09	2.52736e+09
		8	2.457e+09	-2.33074e+09	-2.14495e+09	-1.93398e+09	-1.7154e+09	-1.49807e+09	-1.28632e+09	-1.08219e+09	-8.86497e+08	-6.99457e+08	-5.20979e+08	-3.5082e+08	-1.88671e+08	-3.41949e+07	1.1295e+08	2.53101e+08	3.86586e+08	5.13717e+08	6.34796e+08	7.5011e+08	8.59934e+08	9.64529e+08	1.06414e+09	1.15901e+09	1.24937e+09	1.33542e+09	1.41737e+09	1.49542e+09	1.56975e+09	1.64055e+09	1.70797e+09	1.77218e+09	1.83333e+09	1.89158e+09	1.94705e+09	1.99987e+09	2.05018e+09	2.0981e+09	2.14374e+09	2.1872e+09	2.22859e+09	2.26801e+09	2.30555e+09	2.34131e+09	2.37536e+09	2.40779e+09	2.43868e+09
		9	2.56092e+09	-2.43168e+09	-2.24167e+09	-2.02607e+09	-1.8028e+09	-1.58086e+09	-1.36469e+09	-1.15633e+09	-9.56591e+08	-7.657e+08	-5.83553e+08	-4.09902e+08	-2.44426e+08	-8.6783e+07	6.33785e+07	2.06402e+08	3.42622e+08	4.72359e+08	5.95919e+08	7.13597e+08	8.25671e+08	9.32409e+08	1.03406e+09	1.13088e+09	1.22308e+09	1.3109e+09	1.39453e+09	1.47418e+09	1.55003e+09	1.62228e+09	1.69108e+09	1.75661e+09	1.81902e+09	1.87845e+09	1.93506e+09	1.98897e+09	2.04031e+09	2.08921e+09	2.13578e+09	2.18013e+09	2.22237e+09	2.2626e+09	2.30091e+09	2.3374e+09	2.37215e+09	2.40525e+09	2.43677e+09
		10	2.75882e+09	-2.62659e+09	-2.43237e+09	-2.21212e+09	-1.98415e+09	-1.75762e+09	-1.53702e+09	-1.32442e+09	-1.12064e+09	-9.259e+08	-7.40086e+08	-5.62942e+08	-3.9414e+08	-2.33329e+08	-8.01516e+07	6.57447e+07	2.047e+08	3.37042e+08	4.63084e+08	5.83124e+08	6.97449e+08	8.0633e+08	9.10026e+08	1.00878e+09	1.10284e+09	1.19242e+09	1.27773e+09	1.35898e+09	1.43636e+09	1.51005e+09	1.58024e+09	1.64708e+09	1.71074e+09	1.77137e+09	1.82911e+09	1.88411e+09	1.93648e+09	1.98636e+09	2.03386e+09	2.07911e+09	2.1222e+09	2.16323e+09	2.20231e+09	2.23953e+09	2.27498e+09	2.30874e+09	2.3409e+09
		11	2.84828e+09	-2.71306e+09	-2.51461e+09	-2.28972e+09	-2.05705e+09	-1.82592e+09	-1.6009e+09	-1.38405e+09	-1.17624e+09	-9.77644e+08	-7.88162e+08	-6.07525e+08	-4.35397e+08	-2.71419e+08	-1.15225e+08	3.35438e+07	1.75235e+08	3.10182e+08	4.38705e+08	5.61109e+08	6.77684e+08	7.88708e+08	8.94446e+08	9.95148e+08	1.09106e+09	1.1824e+09	1.26939e+09	1.35223e+09	1.43114e+09	1.50628e+09	1.57785e+09	1.64601e+09	1.71092e+09	1.77275e+09	1.83163e+09	1.8877e+09	1.94111e+09	1.99197e+09	2.04041e+09	2.08654e+09	2.13048e+09	2.17232e+09	2.21217e+09	2.25013e+09	2.28627e+09	2.3207e+09	2.35348e+09
		12	2.96756e+09	-2.82934e+09	-2.62666e+09	-2.39712e+09	-2.15974e+09	-1.92402e+09	-1.69457e+09	-1.47349e+09	-1.26163e+09	-1.05919e+09	-8.66039e+08	-6.81909e+08	-5.06455e+08	-3.3931e+08	-1.80099e+08	-2.84579e+07	1.15969e+08	2.53521e+08	3.84525e+08	5.09292e+08	6.28118e+08	7.41286e+08	8.49065e+08	9.51711e+08	1.04947e+09	1.14257e+09	1.23124e+09	1.31569e+09	1.39612e+09	1.47271e+09	1.54566e+09	1.61514e+09	1.68131e+09	1.74432e+09	1.80434e+09	1.86149e+09	1.91593e+09	1.96777e+09	2.01715e+09	2.06417e+09	2.10896e+09	2.15161e+09	2.19223e+09	2.23092e+09	2.26776e+09	2.30285e+09	2.33627e+09
		13	3.13835e+09	-2.99712e+09	-2.79021e+09	-2.55602e+09	-2.31393e+09	-2.07361e+09	-1.83973e+09	-1.61442e+09	-1.39852e+09	-1.19222e+09	-9.95404e+08	-8.07781e+08	-6.29002e+08	-4.58689e+08	-2.96462e+08	-1.41948e+08	5.2139e+06	1.45372e+08	2.78857e+08	4.05987e+08	5.27063e+08	6.42374e+08	7.52194e+08	8.56785e+08	9.56395e+08	1.05126e+09	1.14161e+09	1.22766e+09	1.30961e+09	1.38766e+09	1.46199e+09	1.53278e+09	1.6002e+09	1.66441e+09	1.72556e+09	1.7838e+09	1.83927e+09	1.89209e+09	1.9424e+09	1.99032e+09	2.03595e+09	2.07941e+09	2.1208e+09	2.16022e+09	2.19776e+09	2.23351e+09	2.26757e+09
		14	3.28654e+09	-3.14231e+09	-2.93116e+09	-2.69231e+09	-2.44552e+09	-2.2006e+09	-1.96228e+09	-1.73273e+09	-1.51279e+09	-1.30265e+09	-1.10216e+09	-9.11045e+08	-7.28939e+08	-5.55459e+08	-3.90216e+08	-2.3283e+08	-8.29316e+07	5.98316e+07	1.95798e+08	3.25291e+08	4.48618e+08	5.66072e+08	6.77934e+08	7.84468e+08	8.8593e+08	9.8256e+08	1.07459e+09	1.16224e+09	1.24571e+09	1.32521e+09	1.40092e+09	1.47303e+09	1.5417e+09	1.6071e+09	1.66939e+09	1.72871e+09	1.78521e+09	1.83902e+09	1.89026e+09	1.93907e+09	1.98555e+09	2.02982e+09	2.07198e+09	2.11213e+09	2.15037e+09	2.18679e+09	2.22147e+09
		15	3.36155e+09	-3.2143e+09	-2.9989e+09	-2.75539e+09	-2.50389e+09	-2.25437e+09	-2.01162e+09	-1.77784e+09	-1.55385e+09	-1.33986e+09	-1.1357e+09	-9.41095e+08	-7.55663e+08	-5.79016e+08	-4.10757e+08	-2.50498e+08	-9.78643e+07	4.75042e+07	1.85952e+08	3.17808e+08	4.43385e+08	5.62983e+08	6.76886e+08	7.85364e+08	8.88678e+08	9.87071e+08	1.08078e+09	1.17003e+09	1.25502e+09	1.33597e+09	1.41306e+09	1.48649e+09	1.55641e+09	1.62301e+09	1.68643e+09	1.74684e+09	1.80437e+09	1.85916e+09	1.91134e+09	1.96103e+09	2.00836e+09	2.05344e+09	2.09637e+09	2.13725e+09	2.17619e+09	2.21327e+09	2.24859e+09
		16	3.54047e+09	-3.39019e+09	-3.17054e+09	-2.92237e+09	-2.66616e+09	-2.41204e+09	-2.16486e+09	-1.92684e+09	-1.69882e+09	-1.48097e+09	-1.27315e+09	-1.07505e+09	-8.86289e+08	-7.06474e+08	-5.35199e+08	-3.72067e+08	-2.16698e+08	-6.87244e+07	7.22046e+07	2.06423e+08	3.34251e+08	4.55992e+08	5.71936e+08	6.82359e+08	7.87524e+08	8.87681e+08	9.83068e+08	1.07391e+09	1.16043e+09	1.24283e+09	1.32131e+09	1.39605e+09	1.46723e+09	1.53502e+09	1.59958e+09	1.66107e+09	1.71963e+09	1.7754e+09	1.82851e+09	1.8791e+09	1.92727e+09	1.97316e+09	2.01686e+09	2.05847e+09	2.09811e+09	2.13586e+09	2.17181e+09
		17	3.73746e+09	-3.58416e+09	-3.36025e+09	-3.10741e+09	-2.84649e+09	-2.58776e+09	-2.33616e+09	-2.0939e+09	-1.86183e+09	-1.64013e+09	-1.42865e+09	-1.22705e+09	-1.03497e+09	-8.51988e+08	-6.77696e+08	-5.11693e+08	-3.53588e+08	-2.03009e+08	-5.95984e+07	7.69835e+07	2.07062e+08	3.30946e+08	4.48932e+08	5.61298e+08	6.68315e+08	7.70235e+08	8.67302e+08	9.59746e+08	1.04779e+09	1.13164e+09	1.2115e+09	1.28755e+09	1.35998e+09	1.42897e+09	1.49467e+09	1.55724e+09	1.61683e+09	1.67358e+09	1.72763e+09	1.77911e+09	1.82813e+09	1.87482e+09	1.91929e+09	1.96164e+09	2.00197e+09	2.04039e+09	2.07697e+09
		18	4.67544e+09	-4.5191e+09	-4.29093e+09	-4.03342e+09	-3.76779e+09	-3.50446e+09	-3.24843e+09	-3.00193e+09	-2.76582e+09	-2.54027e+09	-2.32512e+09	-2.12003e+09	-1.92462e+09	-1.73847e+09	-1.56116e+09	-1.39229e+09	-1.23145e+09	-1.07826e+09	-9.32371e+08	-7.93426e+08	-6.61097e+08	-5.35069e+08	-4.15042e+08	-3.00731e+08	-1.91864e+08	-8.81802e+07	1.0566e+07	1.0461e+08	1.94176e+08	2.79476e+08	3.60715e+08	4.38085e+08	5.11771e+08	5.81948e+08	6.48784e+08	7.12436e+08	7.73058e+08	8.30793e+08	8.85779e+08	9.38146e+08	9.88019e+08	1.03552e+09	1.08075e+09	1.12384e+09	1.16487e+09	1.20395e+09	1.24116e+09
		19	5.85379e+09	-5.69441e+09	-5.46197e+09	-5.19979e+09	-4.92944e+09	-4.66151e+09	-4.40104e+09	-4.15031e+09	-3.91016e+09	-3.68076e+09	-3.46194e+09	-3.25336e+09	-3.05462e+09	-2.86531e+09	-2.68498e+09	-2.51323e+09	-2.34966e+09	-2.19387e+09	-2.04549e+09	-1.90419e+09	-1.76961e+09	-1.64144e+09	-1.51937e+09	-1.40311e+09	-1.29239e+09	-1.18695e+09	-1.08652e+09	-9.90878e+08	-8.99789e+08	-8.13038e+08	-7.30418e+08	-6.51732e+08	-5.76793e+08	-5.05422e+08	-4.3745e+08	-3.72715e+08	-3.11062e+08	-2.52345e+08	-1.96425e+08	-1.43167e+08	-9.24452e+07	-4.41388e+07	1.86735e+06	4.56827e+07	8.74116e+07	1.27153e+08	1.65003e+08
		20	7.63396e+09	-7.47154e+09	-7.23483e+09	-6.96797e+09	-6.6929e+09	-6.42036e+09	-6.15547e+09	-5.9005e+09	-5.65631e+09	-5.42306e+09	-5.20057e+09	-4.98849e+09	-4.78643e+09	-4.59395e+09	-4.41061e+09	-4.23599e+09	-4.06968e+09	-3.91128e+09	-3.76043e+09	-3.61676e+09	-3.47993e+09	-3.34961e+09	-3.2255e+09	-3.1073e+09	-2.99473e+09	-2.88752e+09	-2.78542e+09	-2.68818e+09	-2.59556e+09	-2.50736e+09	-2.42336e+09	-2.34336e+09	-2.26717e+09	-2.1946e+09	-2.12549e+09	-2.05968e+09	-1.99699e+09	-1.93729e+09	-1.88044e+09	-1.82629e+09	-1.77472e+09	-1.7256e+09	-1.67883e+09	-1.63428e+09	-1.59185e+09	-1.55145e+09	-1.51297e+09
[truncated: 215 more columns]

## Sheet: Tabelle1
			Cluster	Population density in inhabitants per km² (upper bound)	Dummy data	Data dummy	CAPEX per Household
			1	2750	0	0	876
			2	1950	0	0	985
			3	1500	0	0	1046
			4	1200	0	0	1087
			5	950	0	0	1136
			6	740	0	0	1201
			7	575	0	0	1254
			8	455	0	0	1359.5
			9	360	0	0	1417
			10	290	0	0	1526.5
			11	235	0	0	1576
			12	190	0	0	1642
			13	155	0	0	1736.5
			14	125	0	0	1818.5
			15	100	0	0	1860
			16	80	0	0	1959
			17	62	0	0	2068
			18	46	0	0	2587
			19	32	0	0	3239
			20	1	0	0	4224
